1 **Non-invasive stimulation of the human striatum disrupts reinforcement learning of**  
2 **motor skills**

3  
4 Pierre Vassiliadis<sup>1,2,3</sup>, Elena Beanato<sup>1,2</sup>, Traian Popa<sup>1,2</sup>, Fabienne Windel<sup>1,2</sup>, Takuya Morishita<sup>1,2</sup>,  
5 Esra Neufeld<sup>4</sup>, Julie Duque<sup>3</sup>, Gerard Derosiere<sup>3,5</sup>, Maximilian J. Wessel<sup>1,2,6</sup> and Friedhelm C. Hummel<sup>1,2,7</sup> \*

6  
7  
8 <sup>1</sup>Defitech Chair of Clinical Neuroengineering, Neuro-X Institute (INX) and Brain Mind Institute (BMI), École  
9 Polytechnique Fédérale de Lausanne (EPFL), 1202 Geneva, Switzerland.

10 <sup>2</sup>Defitech Chair of Clinical Neuroengineering, INX and BMI, EPFL Valais, Clinique Romande de  
11 Réadaptation, 1951 Sion, Switzerland.

12 <sup>3</sup>Institute of Neuroscience, Université Catholique de Louvain, 1200, Brussels, Belgium

13 <sup>4</sup>Foundation for Research on Information Technologies in Society, Zurich, Switzerland

14 <sup>5</sup>Lyon Neuroscience Research Center – Impact team - Inserm U1028 – CNRS UMR5292, Lyon 1  
15 University, Bron, France

16 <sup>6</sup>Department of Neurology, University Hospital, Julius-Maximilians-University, Würzburg, Germany

17 <sup>7</sup>Clinical Neuroscience, University of Geneva Medical School, 1202 Geneva, Switzerland.

18

19

20 **\* CORRESPONDENCE TO:**

21 **Friedhelm C. Hummel**

22 Neuro-X Institute (INX)

23 École Polytechnique Fédérale de Lausanne (EPFL)

24 Campus Biotech, Room H4.3.132.084

25 Chemin des Mines 9, 1202 Geneva, Switzerland

26 and

27 EPFL Valais,

28 Clinique Romande de Réadaptation

29 Av. Grand-Champsec 90,

30 CH-1951 Sion

31 Email: [friedhelm.hummel@epfl.ch](mailto:friedhelm.hummel@epfl.ch)

32 **Abstract**

33

34 Reinforcement feedback can improve motor learning, but the underlying brain mechanisms  
35 remain underexplored. Especially, the causal contribution of specific patterns of oscillatory activity  
36 within the human striatum is unknown. To address this question, we exploited an innovative, non-  
37 invasive deep brain stimulation technique called transcranial Temporal Interference Stimulation  
38 (tTIS) during reinforcement motor learning with concurrent neuroimaging, in a randomised, sham-  
39 controlled, double-blind study. Striatal tTIS applied at 80Hz, but not at 20Hz, abolished the benefits  
40 of reinforcement on motor learning. This effect was related to a selective modulation of neural  
41 activity within the striatum. Moreover, 80Hz, but not 20Hz tTIS increased the neuromodulatory  
42 influence of the striatum on frontal areas involved in reinforcement motor learning. These results  
43 show for the first time that tTIS can non-invasively and selectively modulate a striatal mechanism  
44 involved in reinforcement learning, opening new horizons for the study of causal relationships  
45 between deep brain structures and human behaviour.

46 **Keywords:**

47 Motor learning, reward, reinforcement learning, non-invasive brain stimulation, deep brain

48 stimulation, temporal interference stimulation, striatum, neuroimaging

## 49 **1. Introduction**

50           The ability to learn from past outcomes, often referred to as reinforcement learning, is  
51 fundamental for complex biological systems<sup>1</sup>. Reinforcement learning has been classically studied  
52 in the context of decision making, when agents have to decide between a discrete number of  
53 potential options<sup>2</sup>. Importantly, there is an increasing recognition that reinforcement learning  
54 processes are also at play in other contexts including during practice of a new motor skill<sup>3-5</sup>. For  
55 instance, the addition of reinforcement feedback during motor training can improve motor learning,  
56 presumably by boosting the retention of newly acquired motor memories<sup>6,7</sup>. Interestingly,  
57 reinforcement feedback also appears to be relevant for the rehabilitation of patients suffering from  
58 motor impairments<sup>8-10</sup>. Yet, despite these promising results, there is currently a limited  
59 understanding of the brain mechanisms that are critical to implement this behaviour.

60           A prominent hypothesis in the field is that the striatum, a structure that is particularly active  
61 both during reinforcement<sup>11</sup> and motor learning<sup>12</sup>, may be causally involved in the beneficial effects  
62 of reinforcement on motor learning. As such, the striatum shares dense connexions with  
63 dopaminergic structures of the midbrain as well as with pre-frontal and motor cortical regions<sup>13</sup>,  
64 and is therefore well positioned to mediate reinforcement motor learning<sup>14-16</sup>. This idea is  
65 supported by neuroimaging studies showing reward-related activation of the striatum during motor  
66 learning<sup>17,18</sup>. More specifically, within the striatum, oscillatory activity in specific frequency bands  
67 is suggested to be involved in aspects of reinforcement processing. Previous rodent studies have  
68 shown that striatal high gamma oscillations (~ 80 Hz) transiently increase following reward  
69 delivery<sup>19-23</sup>, but not when reward is withheld<sup>19</sup>. Hence, dynamic changes of high gamma activity  
70 in the striatum<sup>19,24,25</sup> and in other parts of the basal ganglia<sup>26,27</sup> may encode the outcome of  
71 previous movements (i.e., success or failure) and support learning. Consistent with a role of such  
72 oscillatory activity in reinforcement learning, high gamma activity in the striatum shows coherence  
73 with frontal cortex oscillations and is up-regulated by dopaminergic agonists<sup>19</sup>. Hence, this body

74 of work suggests that reinforcement-related modulation of striatal oscillatory activity, especially in  
75 the gamma range, may be crucial for reinforcement learning of motor skills. Conversely, striatal  
76 beta oscillations (~20 Hz) have been largely associated with sensorimotor functions<sup>28</sup>. For  
77 instance, beta oscillations in the striatum are exacerbated in Parkinson's disease and associated  
78 to the severity of motor symptoms<sup>29-31</sup>. Consistently, excessive beta connectivity is reduced by  
79 anti-parkinsonian treatment in proportion to the related motor improvement<sup>32</sup>. Taken together,  
80 these elements suggest that striatal high gamma and beta activity may have different functional  
81 roles preferentially associated to reinforcement and sensorimotor functions, respectively.

82 The studies mentioned above provide associative evidence linking the presence of  
83 reinforcement with changes of neural activity within the striatum determined through  
84 neuroimaging<sup>17,18</sup>, but do not allow to draw conclusions regarding its causal role in reinforcement  
85 motor learning in humans. The only causal evidence available to date comes from animal work  
86 showing modulation of reinforcement-based decision-making with striatal stimulation<sup>33,34</sup>. A  
87 reason for the current absence of investigations of the causal role of the striatum in human  
88 behaviour is related to its deep localization in the brain. As such, current non-invasive brain  
89 stimulation techniques, such as transcranial magnetic stimulation (TMS) or classical transcranial  
90 electric stimulation (tES), do not allow to selectively target deep brain regions, because these  
91 techniques exhibit a steep depth-focality trade-off<sup>35,36</sup>. Studies of patients with striatal lesions<sup>37,38</sup>  
92 or invasive deep brain stimulation of connected nuclei<sup>39,40</sup> have provided insights into the role of  
93 the basal ganglia in reinforcement learning. However, their conclusions are partially limited by the  
94 fact that the studied patients also exhibit altered network properties resulting from the underlying  
95 pathology (e.g., neurodegeneration, lesions) or from the respective compensatory mechanisms.  
96 Here, we address these challenges by exploiting transcranial electric Temporal Interference  
97 Stimulation (tTIS), a new non-invasive brain stimulation approach allowing to target deep brain  
98 regions in a frequency-specific and focal manner in the physiological state<sup>41,42</sup>.

99           The concept of tTIS was initially proposed and validated on the hippocampus of rodents<sup>41</sup>  
100 and was then further tested through computational modelling<sup>43-47</sup> and in first applications on  
101 cortical areas in humans<sup>48,49</sup>. tTIS requires two pairs of electrodes to be placed on the head, each  
102 pair delivering a high frequency alternating current. One key element is that this frequency has to  
103 be high enough (i.e., in the kHz range) to avoid direct neuronal entrainment, based on the low-  
104 pass filtering properties of neuronal membranes<sup>50</sup>. The second key element is the application of a  
105 small difference of frequency between the two alternating currents. The superposition of the  
106 electric fields creates an envelope oscillating at this low-frequency difference, which can be  
107 steered towards individual deep brain structures (e.g., by optimizing electrodes' placement), and  
108 is in a range able to influence neuronal activity<sup>41,51-53</sup>. An interesting feature of tTIS is to stimulate  
109 at a particular frequency of interest in order to preferentially interact with specific neuronal  
110 processes<sup>41,42</sup>. Importantly, despite these exciting opportunities, current evidence for tTIS-related  
111 neuromodulation of deep brain structures, such as the striatum, is lacking in humans.

112           Here, we combine tTIS with electric field modelling for target localisation, behavioural data  
113 and functional magnetic resonance imaging (fMRI) to evaluate the causal role of specific patterns  
114 of striatal activity in reinforcement learning of motor skills. Based on the studies mentioned above,  
115 we hypothesised that striatal tTIS at high gamma frequency (tTIS<sub>80Hz</sub>) would disturb the fine-tuning  
116 of high gamma oscillatory activity in the striatum and thereby would perturb reinforcement motor  
117 learning in contrast to beta (tTIS<sub>20Hz</sub>) or sham (tTIS<sub>Sham</sub>) stimulation. More specifically, we  
118 reasoned that applying a constant high gamma rhythm in the striatum would disturb the temporally  
119 precise and reinforcement-specific modulation of high gamma activity. Moreover, given that the  
120 stimulation protocol was not individualised to endogenous high gamma activity and not  
121 synchronised to ongoing activity in other hubs of the reinforcement learning network (e.g., the  
122 frontal cortex), we anticipated disruptive rather than beneficial effects of tTIS<sub>80Hz</sub>.

123           In line with our prediction, we report that tTIS<sub>80Hz</sub> disrupted motor learning compared to the  
124 controls, but only in the presence of reinforcement. To evaluate the potential neural correlates of  
125 these behavioral effects, we measured BOLD activity in the striatum and effective connectivity  
126 between the striatum and frontal cortical areas involved in reinforcement motor learning. We found  
127 that the disruptive effect of tTIS<sub>80Hz</sub> on reinforcement learning was associated to a specific  
128 modulation of BOLD activity in the putamen and caudate, but not in the cortex, supporting the  
129 ability of tTIS to selectively modulate striatal activity without affecting overlying cortical areas.  
130 Moreover, tTIS<sub>80Hz</sub> also increased the neuromodulatory influence of the striatum on frontal cortical  
131 areas involved in reinforcement motor learning. Overall, the present study shows for the first time  
132 that tTIS can non-invasively and selectively modulate a striatal mechanism involved in  
133 reinforcement learning opening new horizons for the study of causal relationships between deep  
134 brain structures and human behaviour.

## 135 2. Results

136

137 24 healthy participants (15 women,  $25.3 \pm 0.1$  years old; mean  $\pm$  SE) performed a force

138 tracking task in the MRI with concurrent tTIS of the striatum. The task required participants to

139 modulate the force applied on a hand-grip force sensor in order to track a moving target with a

140 cursor with the right, dominant hand<sup>54,55</sup> (**Figure 1A**). At each block, participants had to learn a

141 new pattern of motion of the target (**Figure S1**; see Methods). In Reinf<sub>ON</sub> blocks, participants were

142 provided with online reinforcement feedback during training, giving them real-time information

143 about success or failure throughout the trial, indicated as a green or red target, respectively

144 (please see **Video S1** for the task). The reinforcement feedback was delivered according to a

145 closed-loop schedule<sup>8</sup>, in which the success criterion to consider a force sample as successful

146 was updated based on the median performance over the 4 previous trials (see Methods for more

147 details). In Reinf<sub>OFF</sub> blocks, participants practiced with a visually matched random feedback

148 (cyan/magenta). Importantly, in both types of blocks, training was performed with partial visual

149 feedback of the cursor, a condition that has been shown to maximise reinforcement effects in

150 various motor learning paradigms<sup>4,56–58</sup> and which yielded significant effects of reinforcement on

151 motor learning as also demonstrated in an additional behavioural study testing another group of

152 healthy participants on the same task ( $n = 24$ , Figure S2). Before and after training, participants

153 performed Pre- and Post-training assessments with full visual feedback, no reinforcement and no

154 tTIS, allowing us to evaluate motor learning. To assess the effect of tTIS on reinforcement-related

155 benefits in motor learning and the associated neural changes, participants performed 6 blocks of

156 36 trials in the MRI, with concurrent tTIS during training, delivered with a  $\Delta f$  of 20 Hz (tTIS<sub>20Hz</sub>), 80

157 Hz (tTIS<sub>80Hz</sub>) or as a sham (tTIS<sub>Sham</sub>; 3 tTIS<sub>TYPE</sub>  $\times$  2 Reinf<sub>TYPE</sub> conditions; **Figure 1B, 1C**). Notably,

158 the order of the conditions was balanced among the 24 participants, ensuring that any potential

159 carry-over effect would have the same impact on each experimental condition. To determine the

160 best electrode montage to stimulate the human striatum (putamen, caudate and nucleus



161 accumbens [NAc] bilaterally), computational modelling with a realistic head model was conducted  
 162 with Sim4Life<sup>59</sup> (see Methods). The selected montage (F3-F4; TP7-TP8) generated a theoretical  
 163 temporal interference electric field that was ~30-40% stronger in the striatum than in the overlying  
 164 cortex, reaching magnitudes of 0.5 to 0.6 V/m (**Figure 1D, 1E**).

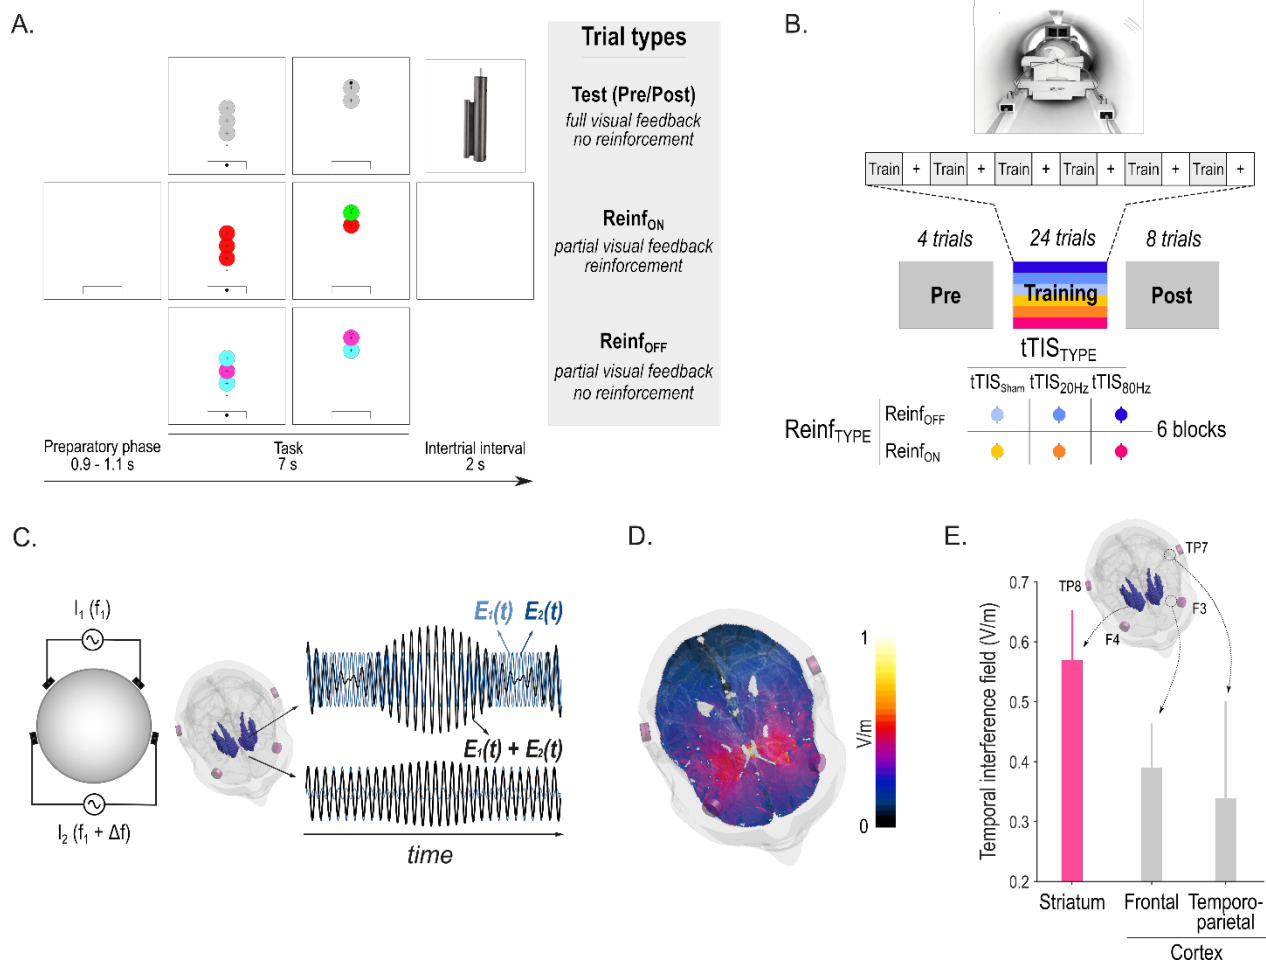

165

166 **Figure 1. Striatal tTIS during reinforcement learning of motor skills in the MRI. A)**  
 167 **Motor learning task.** Participants were required to squeeze a hand grip force sensor (depicted in  
 168 the upper right corner of the figure) in order to track a moving target (larger circle with a cross in  
 169 the center) with a cursor (black smaller circle)<sup>54,55</sup>. Pre- and Post-training assessments were  
 170 performed with full visual feedback of the cursor and no reinforcement. In Reinf<sub>ON</sub> and Reinf<sub>OFF</sub>  
 171 trials, participants practiced the task with or without reinforcement feedback, respectively. As such,  
 172 in Reinf<sub>ON</sub> trials, the color of the target varied in real-time as a function of the subjects' tracking  
 173 performance. **B) Experimental procedure.** Participants performed the task in the MRI with  
 174 concomitant TI stimulation. Blocks of training were composed of 36 trials (4 Pre-, 24 Training and  
 175 8 Post-training trials) interspersed with short resting periods (represented as + on the figure). The  
 176 6 training types resulted from the combination of 3 tTIS<sub>TYPE</sub>s and 2 Reinf<sub>TYPE</sub>s. **C) Concept of tTIS.**  
 177 On the left, two pairs of electrodes are shown on a head model and currents are applied with a

178 frequency  $f_1$  and  $f_1 + \Delta f$ . On the right, the interference of the two electric fields within the brain is  
179 represented for two different locations with respectively high and low envelope modulation.  $E_1(t)$   
180 and  $E_2(t)$  represent the modulation of the fields' magnitude over time. tTIS was delivered either  
181 with a  $\Delta f$  of 20 or 80 Hz or as a sham (ramp-up and immediate ramp-down of high frequency  
182 currents with flat envelope). **D) Electric field modelling with the striatal montage.** Temporal  
183 interference exposure (electric field modulation magnitude). **E) Temporal interference exposure**  
184 **averaged in the striatum and in the overlying cortex.** Magnitude of the field in the cortex was  
185 extracted from the Brainnetome atlas (BNA<sup>60</sup>) regions underneath the stimulation electrodes (F3-  
186 F4 and TP7-TP8). Error bars represent the standard deviation over the voxels in the considered  
187 region.

188

### 189 **tTIS<sub>80Hz</sub> disrupts reinforcement learning of motor skills**

190 Task performance was evaluated by means of the Error, which was defined as the absolute  
191 difference between the applied and target force averaged across samples for each trial, as done  
192 previously<sup>4,54,56</sup> (**Figure 2A**). Across conditions, the Post-training Error was reduced compared to  
193 the Pre-training Error (single sample t-test on the normalised Post-training data:  $t_{(24)} = -2.69$ ;  
194  $p = 0.013$ ; Cohen's  $d = -0.55$ ), indicating significant motor learning during the task (**Figure 2B**). Such  
195 improvement was greater when participants had trained with reinforcement (Reinf<sub>TYPE</sub> effect in the  
196 Linear Mixed Model (LMM):  $F_{(1, 1062.2)} = 5.17$ ;  $p = 0.023$ ;  $d = -0.14$  for the post-hoc contrast Reinf<sub>ON</sub> –  
197 Reinf<sub>OFF</sub>), confirming the beneficial effect of reinforcement on motor learning<sup>7,58</sup>. Crucially though,  
198 this effect depended on the type of stimulation applied during training (Reinf<sub>TYPE</sub> × tTIS<sub>TYPE</sub>  
199 interaction:  $F_{(2, 1063.5)} = 2.11$ ;  $p = 0.034$ ; **Figure 2C**). While reinforcement significantly improved  
200 learning when training was performed with tTIS<sub>Sham</sub> ( $p = 0.036$ ;  $d = -0.22$ ) and tTIS<sub>20Hz</sub> ( $p = 0.0089$ ;  
201  $d = -0.27$ ), this was not the case with tTIS<sub>80Hz</sub> ( $p = 0.43$ ;  $d = 0.083$ ). Consistently, direct between-  
202 condition comparisons showed that in the Reinf<sub>ON</sub> condition, learning was reduced with tTIS<sub>80Hz</sub>  
203 compared to tTIS<sub>20Hz</sub> ( $p = 0.039$ ;  $d = 0.26$ ) and tTIS<sub>Sham</sub> ( $p < 0.001$ ;  $d = 0.45$ ) but was not different  
204 between tTIS<sub>20Hz</sub> and tTIS<sub>Sham</sub> ( $p = 0.15$ ;  $d = 0.20$ ). This disruption of motor learning with tTIS<sub>80Hz</sub> was  
205 not observed in the absence of reinforcement (tTIS<sub>80Hz</sub> vs. tTIS<sub>20Hz</sub>:  $p = 0.59$ ;  $d = -0.10$ , tTIS<sub>80Hz</sub> vs.  
206 tTIS<sub>Sham</sub>:  $p = 0.34$ ;  $d = 0.15$ ). These results strongly point to the fact that high gamma striatal tTIS

207 specifically disrupts the benefits of reinforcement on motor learning and not motor learning in  
208 general.

209 Although training with tTIS<sub>20Hz</sub> did not alter the benefits of reinforcement on motor learning,  
210 we found that learning without reinforcement was significantly impaired in this condition (tTIS<sub>20Hz</sub>  
211 vs. tTIS<sub>Sham</sub>:  $p=0.046$ ;  $d=0.25$ , **Figure 2C**). This suggests that tTIS<sub>20Hz</sub> may disrupt a qualitatively  
212 different mechanism involved in motor learning from sensory feedback<sup>61</sup>, in line with the role of  
213 striatal beta oscillations in sensorimotor function<sup>28</sup>.

214 Next, we evaluated the effect of tTIS on motor performance during training itself. As shown  
215 in Figure 2A, the Error was generally higher during Training than in Test trials due to the presence  
216 of visual uncertainty during this phase. The extent of this disruption was reduced in the presence  
217 of reinforcement (Reinf<sub>TYPE</sub>:  $F_{(1, 3262.4)}=339.89$ ;  $p<0.001$ ;  $d=-0.64$  for the contrast Reinf<sub>ON</sub> –  
218 Reinf<sub>OFF</sub>), demonstrating the ability of subjects to exploit real-time reinforcement information to  
219 improve tracking (**Figure 2D**). Notably, this effect was not modulated by tTIS<sub>TYPE</sub> (Reinf<sub>TYPE</sub> X  
220 tTIS<sub>TYPE</sub>:  $F_{(2, 3265.8)}=0.91$ ;  $p=0.40$ ), indicating that tTIS did not directly influence reinforcement gains  
221 during tracking. Interestingly though, striatal stimulation did impact on general tracking  
222 performance independently of reinforcement as indicated by a significant tTIS<sub>TYPE</sub> effect (tTIS<sub>TYPE</sub>:  
223  $F_{(2, 3262.4)}=42.85$ ;  $p<0.001$ ). This effect was due to an increase in the Error when tTIS<sub>20Hz</sub> was  
224 applied ( $p<0.001$ ;  $d=0.28$  when compared to tTIS<sub>Sham</sub>), which was even stronger during tTIS<sub>80Hz</sub>  
225 ( $p<0.001$ ;  $d=0.38$  and  $p=0.031$ ;  $d=0.11$  when compared to tTIS<sub>Sham</sub> and tTIS<sub>20Hz</sub>, respectively). An  
226 additional analysis showed that the detrimental effect of tTIS on motor performance was actually  
227 due to an impaired ability to improve performance during Training (LMM with continuous fixed  
228 effect Trial: tTIS<sub>TYPE</sub> X Trial interaction:  $F_{(2, 3399)}=4.46$ ;  $p=0.012$ , post-hoc tests: tTIS<sub>Sham</sub> vs. tTIS<sub>20Hz</sub>:  
229  $p=0.013$ ; tTIS<sub>Sham</sub> vs. tTIS<sub>80Hz</sub>:  $p=0.068$ ; tTIS<sub>20Hz</sub> vs. tTIS<sub>80Hz</sub>:  $p=0.81$ ; **Figure S3**). However, again,  
230 this effect did not depend on the presence of reinforcement (Reinf<sub>TYPE</sub> X tTIS<sub>TYPE</sub> X Trial:  $F_{(2,$   
231  $3399)}=0.51$ ;  $p=0.60$ ). Notably, we also found that the detrimental effect of striatal tTIS did not depend

232 on the availability of visual information on the cursor, but rather that tTIS had a general effect on  
233 motor performance irrespective of visual and reinforcement feedback (see Supplementary  
234 materials). This analysis also confirmed that reinforcement gains in motor performance were  
235 stronger when visual information was not available (**Figure S4**), in line with the behavioural data  
236 mentioned above (Figure S2) and previous studies<sup>57,62</sup>. Overall, these results suggest that striatal  
237 tTIS altered motor performance in a frequency-dependent manner but did not influence the ability  
238 to rapidly adjust motor commands based on reinforcement feedback during training. Hence,  
239 tTIS<sub>80Hz</sub> may not disrupt real-time processing of reinforcement feedback, but may rather impair the  
240 beneficial effect of reinforcements on the retention of motor memories<sup>6,7</sup>.

241 Notably, these effects could not be explained by potential differences in initial performance  
242 between conditions (Reinf<sub>TYPE</sub> × tTIS<sub>TYPE</sub>:  $F_{(2, 519.99)}=1.08$ ;  $p=0.34$ ), nor by changes in the flashing  
243 properties of the reinforcement feedback (i.e., the frequency of color change during tracking;  
244 Reinf<sub>TYPE</sub> × tTIS<sub>TYPE</sub>:  $F_{(2, 3283)}=0.19$ ;  $p=0.82$ ), or by differences in success rate in the Reinf<sub>ON</sub> blocks  
245 (i.e., the proportion of success feedback during tracking; tTIS<sub>TYPE</sub>:  $F_{(2, 1702)}=0.17$ ;  $p=0.84$ ). The  
246 Reinf<sub>TYPE</sub> × tTIS<sub>TYPE</sub> effect on learning was also not influenced by the order of the reinforcement  
247 conditions (analysis on sub-groups based on whether participants experienced Reinf<sub>ON</sub> or Reinf<sub>OFF</sub>  
248 first; no Reinf<sub>TYPE</sub> × tTIS<sub>TYPE</sub> × Group<sub>TYPE</sub> interaction:  $F_{(2, 1105.06)}=1.75$ ;  $p=0.17$ ; see Supplementary  
249 materials for more details on these analyses).

250 Finally, we confirmed that these results were not a consequence of an inefficient blinding.  
251 As such, when debriefing after the experiment, only 6/24 participants were able to successfully  
252 identify the order of the stimulation applied (e.g., real – real – placebo; chance level: 4/24; Fisher  
253 exact test on proportions:  $p=0.74$ ). Consistently, the magnitude (**Figure S5A**) and type (**Figure**  
254 **S5B**) of tTIS-evoked sensations evaluated before the experiment were qualitatively similar across  
255 conditions and tTIS was generally well tolerated in all participants (no adverse events reported).  
256 This suggests that blinding was successful and is unlikely to explain our findings. More generally,

257 this is a first indication that tTIS evokes very limited sensations (e.g., only 2/24 and 1/24 subjects  
 258 rated sensations evoked at 2 mA as “strong” for tTIS<sub>20Hz</sub> and tTIS<sub>80Hz</sub>, respectively; **Figure S5A**)  
 259 that are compatible with efficient blinding.

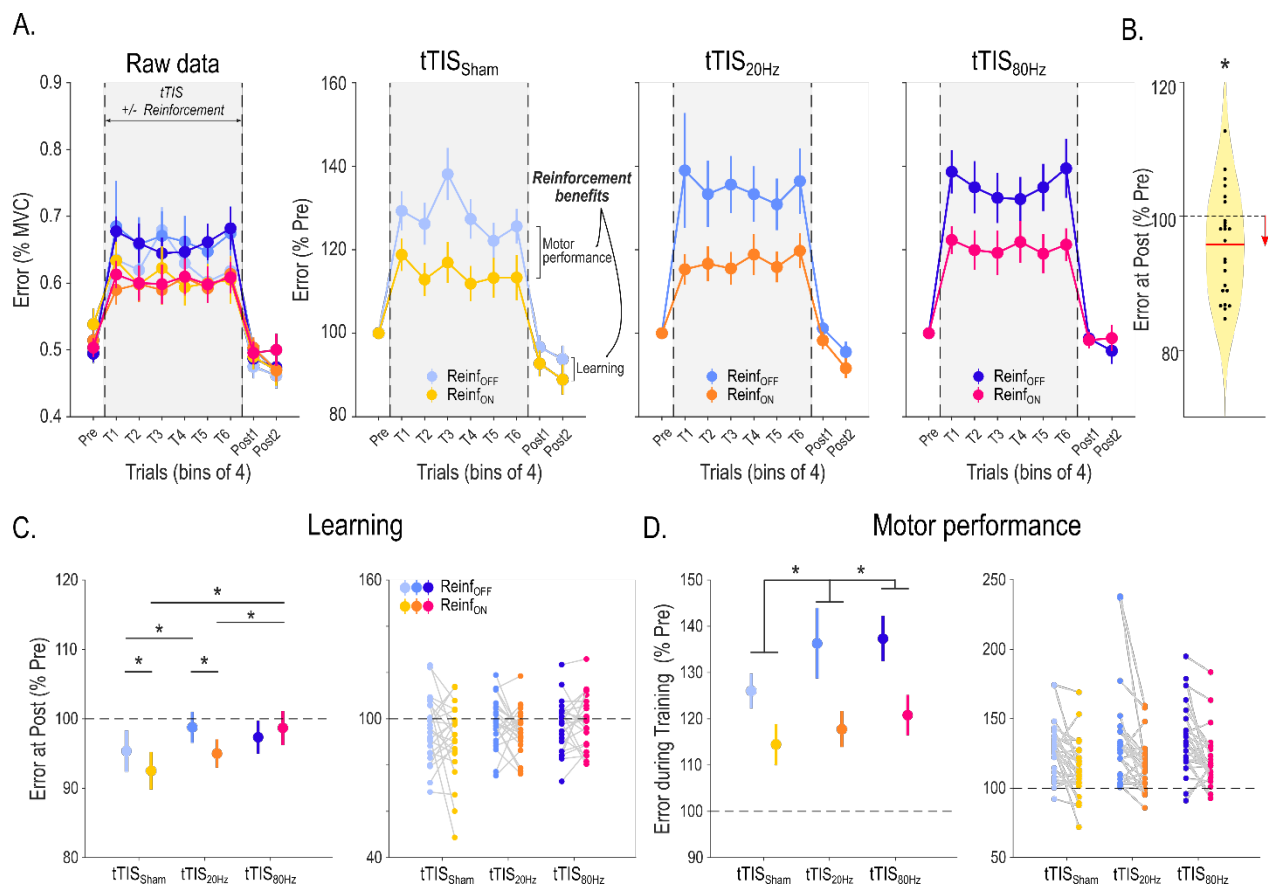

260  
 261 **Figure 2. Behavioural results. A) Motor performance across training.** Raw Error data  
 262 (expressed in % of Maximum Voluntary Contraction [MVC]) are presented on the left panel for the  
 263 different experimental conditions in bins of 4 trials. The increase in Error during Training is related  
 264 to the visual uncertainty (i.e., intermittent disappearance of the cursor) that was applied to enhance  
 265 reinforcement effects. On the right, the three plots represent the Pre-training normalised Error in  
 266 the tTIS<sub>Sham</sub>, tTIS<sub>20Hz</sub> and tTIS<sub>80Hz</sub> blocks. Reinforcement-related benefits represent the  
 267 improvement in the Error measured in the Reinf<sub>ON</sub> and Reinf<sub>OFF</sub> blocks, during Training (reflecting  
 268 benefits in motor performance) or at Post-training (reflecting benefits in learning). **B) Averaged**  
 269 **learning across conditions.** Violin plot showing the Error distribution at Post-training (expressed  
 270 in % of Pre-training) averaged across conditions, as well as individual subject data. A single-  
 271 sample t-test showed that the Post-training Error was reduced compared to the Pre-training level,  
 272 indicating significant learning in the task. **C) Motor learning.** Averaged Error at Post-training  
 273 (normalised to Pre-training) and the corresponding individual data points in the different  
 274 experimental conditions are shown on the left and right panels, respectively, for the subjects  
 275 included in the analysis (i.e., after outlier detection, remaining n=23). Reduction of Error at Post-  
 276 training reflects true improvement at tracking the target in Test conditions (in the absence of  
 277 reinforcement, visual uncertainty or tTIS). The LMM ran on these data revealed a specific effect

278 of tTIS<sub>80Hz</sub> on reinforcement-related benefits in learning. **D) Motor performance.** Averaged Error  
279 during Training (normalised to Pre-training) and the corresponding individual data points in the  
280 different experimental conditions are shown on the left and right panels, respectively, for the  
281 subjects included in the analysis (i.e., after outlier detection, n=23). Individual data points are  
282 shown on the right panel. Error change during Training reflect the joint contribution of the  
283 experimental manipulations (visual uncertainty, potential reinforcement and tTIS) on motor  
284 performance. The LMM ran on these data showed a frequency-dependent effect of tTIS on motor  
285 performance, irrespective of reinforcement. \*: p<0.05. Data are represented as mean ± SE.

286

## 287 **The effect of tTIS<sub>80Hz</sub> on reinforcement motor learning is related to modulation of neural** 288 **activity in the striatum**

289 As mentioned above, task-based fMRI was acquired during Training with concomitant tTIS.  
290 This allowed us to evaluate the neural effects of tTIS and their potential relationship to the  
291 behavioural effects reported above. As a first qualitative evaluation of the data, we performed a  
292 whole-brain analysis in the tTIS<sub>Sham</sub> condition to assess the network activated during reinforcement  
293 motor learning (Reinf<sub>ON</sub> condition). Consistent with previous neuroimaging studies employing  
294 similar tasks<sup>63,64</sup>, we found prominent BOLD activations in a motor network including the putamen,  
295 thalamus, cerebellum and sensorimotor cortex, particularly on the left hemisphere, contralateral  
296 to the trained hand (**Figure S6, Table S2**). Notably though, contrasting Reinf<sub>ON</sub> and Reinf<sub>OFF</sub>  
297 conditions did not reveal any significant cluster at the whole-brain level. Hence, this first analysis  
298 did not reveal any region specifically activated in the presence of reinforcement, but rather  
299 confirms the involvement of a motor network engaged in this type of task irrespective of the  
300 reinforcement feedback.

301 As a second step, we evaluated the effect of tTIS on striatal activity, as a function of the  
302 type of reinforcement feedback and focusing on the very same regions of interest (ROI) that were  
303 used to optimise tTIS exposure in the modelling. Based on this, we extracted averaged BOLD  
304 activity within the bilateral putamen, caudate and NAc based on the Brainnetome atlas (BNA<sup>60</sup>),  
305 in the different experimental conditions and considered these six striatal ROIs (ROI<sub>STR</sub>) as fixed  
306 effects in the LMM. This model revealed a strong enhancement of striatal activity with Reinf<sub>ON</sub> with

307 respect to Reinf<sub>OFF</sub> ( $F_{(1, 800.01)}=13.23$ ;  $p<0.001$ ;  $d=0.25$  for the contrast Reinf<sub>ON</sub> – Reinf<sub>OFF</sub>)  
308 consistent with previous literature<sup>11</sup>, but no tTIS<sub>TYPE</sub> effect ( $F_{(2, 800.01)}=0.46$ ;  $p=0.63$ ) and no  
309 interaction (all  $p> 0.65$ ; **Figure 3A**). Despite the absence of effects of tTIS on averaged striatal  
310 activity, we then asked whether the behavioural effects of tTIS<sub>80Hz</sub> on reinforcement motor learning  
311 (i.e., tTIS<sub>80Hz</sub> vs. tTIS<sub>20Hz</sub> and tTIS<sub>Sham</sub> with Reinf<sub>ON</sub>) could be linked to modulation of activity in core  
312 brain regions. To do so, we ran a whole-brain analysis focusing on the main behavioural effects  
313 mentioned above. Results revealed that the effect of tTIS<sub>80Hz</sub> (with respect to tTIS<sub>20Hz</sub>) on motor  
314 learning in the Reinf<sub>ON</sub> condition was specifically related to modulation of activity in two clusters  
315 encompassing the left putamen and bilateral caudate (**Figure 3B, Table S3**). Notably, the  
316 presence of the high frequency carrier (kHz) in both stimulation conditions rules out the possibility  
317 that the correlation was due to putative neuromodulatory effects of high frequency stimulation. No  
318 significant clusters were found neither for the tTIS<sub>80Hz</sub> – tTIS<sub>Sham</sub> contrast, nor for the control  
319 tTIS<sub>20Hz</sub> - tTIS<sub>Sham</sub> contrast, indicating that the reported correlation is not due to a general link  
320 between striatal activity and reinforcement motor learning. Overall, these results provide evidence  
321 that the detrimental effect of tTIS<sub>80Hz</sub> on reinforcement learning of motor skills is related to  
322 modulation of neural activity specifically in the striatum.

A.

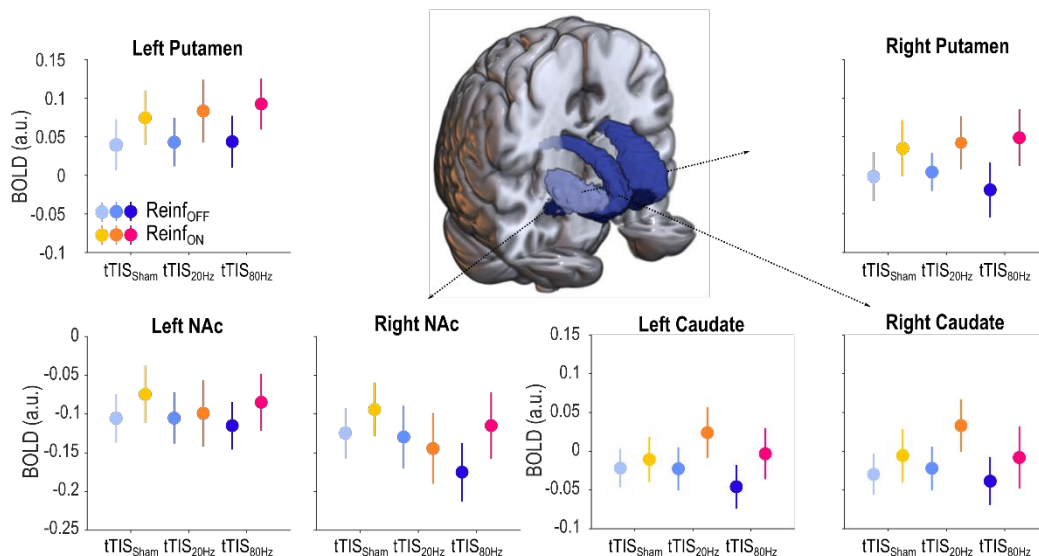

B.

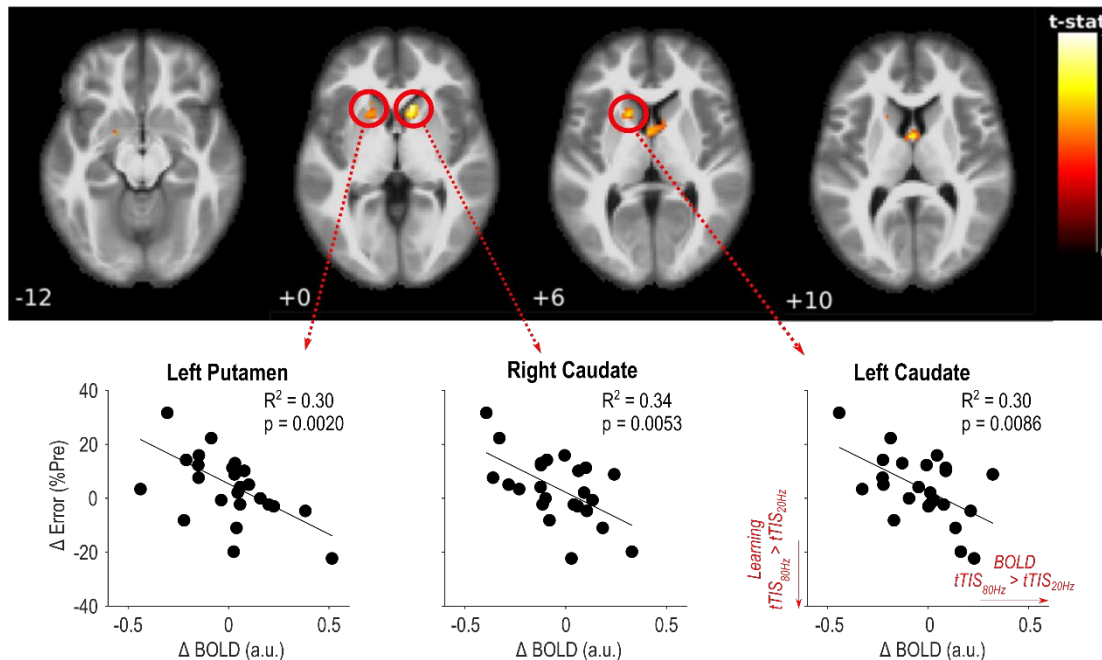

323

324 **Figure 3. Striatal activity. A) Striatal BOLD responses.** A 3D-reconstruction of the  
 325 striatal masks used in the current experiment is surrounded by plots showing averaged BOLD  
 326 activity for each mask in the different experimental conditions. A LMM ran on these data showed  
 327 higher striatal responses in the Reinf<sub>ON</sub> with respect to the Reinf<sub>OFF</sub> condition, but no effect of  
 328 tTIS<sub>TYPE</sub> and no interaction. **B) Whole-brain activity associated to the behavioural effect of**  
 329 **tTIS<sub>80Hz</sub> on reinforcement motor learning.** Correlation between tTIS-related modulation of  
 330 striatal activity (tTIS<sub>80Hz</sub> – tTIS<sub>20Hz</sub>) and learning abilities in the Reinf<sub>ON</sub> condition. Significant  
 331 clusters of correlation were found in the left putamen and bilateral caudate (uncorrected voxel-  
 332 wise FWE: p=0.001, and corrected cluster-based FDR: p=0.05). Lower panel shows individual  
 333 correlations for the three significant regions highlighted in the whole-brain analysis. \*: p<0.05. Data  
 334 are represented as mean ± SE.

335



336 **tTIS<sub>80Hz</sub> enhances effective connectivity between the striatum and frontal cortex.**

337 Interactions between the striatum and frontal cortex are crucial for a variety of behaviours  
338 including motor and reinforcement learning<sup>13</sup>. In particular, reinforcement motor learning requires  
339 to use information about task success to guide future motor commands<sup>4</sup>, a process for which the  
340 striatum may play an integrative role at the interface between fronto-striatal loops involved in  
341 reward processing and motor control<sup>13,65</sup>. In a subsequent analysis, we asked whether striatal tTIS  
342 modulates striatum to frontal cortex communication during reinforcement motor learning. More  
343 specifically, we computed effective connectivity (using the generalized psychophysiological  
344 interactions method<sup>66</sup>) between striatal and frontal regions classically associated with motor and  
345 reward-related functions, and thought to be involved in reinforcement motor learning<sup>67,68</sup>. For the  
346 motor network, we evaluated effective connectivity between motor parts of the striatum (i.e., dorso-  
347 lateral putamen (dIPu) and dorsal caudate (dCa)) and two regions strongly implicated in motor  
348 learning: the medial part of the supplementary motor area (SMA) and the part of the primary motor  
349 cortex (M1) associated to upper limb functions (**Figure 4A**). For the reward network, we assessed  
350 connectivity between parts of the striatum classically associated to limbic functions (i.e., the NAc  
351 and the ventro-medial putamen (vmPu) and two frontal areas involved in reward processing: the  
352 anterior cingulate cortex (ACC) and the ventro-medial prefrontal cortex (vmPFC; **Figure 4B**; <sup>11</sup>).  
353 The LMM ran with the fixed effects Reinf<sub>TYPE</sub>, tTIS<sub>TYPE</sub> and Network<sub>TYPE</sub> showed a significant effect  
354 of tTIS<sub>TYPE</sub> ( $F_{(2, 2264.0)}=5.42$ ;  $p=0.0045$ ), that was due to higher connectivity in the tTIS<sub>80Hz</sub> condition  
355 with respect to tTIS<sub>Sham</sub> ( $p=0.0038$ ;  $d=0.16$ ) and tTIS<sub>20Hz</sub> (at the trend level,  $p=0.069$ ;  $d=0.11$ ). There  
356 was no difference in connectivity between tTIS<sub>20Hz</sub> and tTIS<sub>Sham</sub> ( $p=0.58$ ;  $d=0.051$ ). Hence, tTIS<sub>80Hz</sub>,  
357 but not tTIS<sub>20Hz</sub>, enhanced effective connectivity between the striatum and frontal cortex during  
358 motor training. This increase in effective connectivity with tTIS<sub>80Hz</sub> actually led to a connectivity  
359 closer to the resting state (values closer to 0, see Methods). Put differently, while the task induced

360 a reduction in effective connectivity between striatum and frontal cortex, tTIS<sub>80Hz</sub> disrupted this  
361 modulation by bringing connectivity back to the resting state.

362 The LMM did not reveal any effect of Reinf<sub>TYPE</sub> ( $F_{(1, 2264.0)}=0.010$ ;  $p=0.92$ ), Network<sub>TYPE</sub> ( $F_{(1, 2264.0)}=3.16$ ;  $p=0.076$ ) and no double interaction (note the trend for a Reinf<sub>TYPE</sub> x Network<sub>TYPE</sub> effect  
363 though:  $F_{(1, 2264.0)}=3.52$ ;  $p=0.061$ ). Yet, we did find a significant Reinf<sub>TYPE</sub> x tTIS<sub>TYPE</sub> x Network<sub>TYPE</sub>  
364 interaction ( $F_{(2, 2264.0)}=4.87$ ;  $p=0.0078$ ). Such triple interaction was related to the fact that tTIS<sub>80Hz</sub>  
365 increased connectivity in the Reinf<sub>ON</sub> condition in the motor network (Reinf<sub>ON</sub> vs. Reinf<sub>OFF</sub>:  
366  $p=0.0012$ ;  $d=0.33$ ; Figure 4A), while it tended to have the opposite effect in the reward network  
367 ( $p=0.063$ ;  $d=-0.19$ ; Figure 4B). This increase was not present in any of the two networks when  
368 either tTIS<sub>Sham</sub> or tTIS<sub>20Hz</sub> were applied (all  $p > 0.40$ ). Moreover, in the motor network, connectivity  
369 in the Reinf<sub>ON</sub> condition was higher with tTIS<sub>80Hz</sub> than with tTIS<sub>Sham</sub> ( $p < 0.001$ ;  $d=0.42$ ) and tTIS<sub>20Hz</sub>  
370 (at the trend level;  $p=0.059$ ;  $d=0.23$ , Figure 4A). These data suggest that tTIS<sub>80Hz</sub> enhanced the  
371 neuromodulatory influence of the striatum on motor cortex during task performance, but only in  
372 the presence of reinforcement. In the reward network, post-hocs revealed that connectivity in the  
373 Reinf<sub>OFF</sub> condition was significantly higher with tTIS<sub>80Hz</sub> compared to tTIS<sub>20Hz</sub> ( $p=0.045$ ;  $d=0.25$ ;  
374 Figure 4B), in line with the general effect of tTIS<sub>TYPE</sub> on connectivity reported above. This pattern  
375 of results suggests that the increase of connectivity from striatum to frontal cortex observed with  
376 tTIS<sub>80Hz</sub> depends on the presence of reinforcement, in particular in the motor network. Such  
377 reinforcement-dependent increase of connectivity may reflect the preferential effect of tTIS<sub>80Hz</sub> on  
378 striatal gamma oscillations<sup>69</sup> in a situation where these oscillations are already boosted by the  
379 presence of reinforcement<sup>19</sup> (see Discussion).

381 In a subsequent analysis, we verified that these results did not depend on the specific  
382 frontal ROIs considered in the analysis (ROI<sub>TYPE</sub>: M1 and SMA in the motor network and ACC and  
383 vmPFC in the reward network). Importantly, we did not find a tTIS<sub>TYPE</sub> x Reinf<sub>TYPE</sub> x ROI<sub>TYPE</sub>  
384 interaction neither in the motor ( $F_{(2,1112)}=0.83$ ;  $p=0.44$ ) nor in the reward network ( $F_{(2,1112)}=0.61$ ;

385  $p=0.54$ ), suggesting that the main connectivity results were consistent within a network and were  
386 not influenced by the specific frontal ROI included in the analysis (see Supplementary materials  
387 for more details on this analysis). As an additional control, we verified that the effects of  $tTIS_{TYPE}$   
388 on connectivity could not be observed in a control network associated to language (as defined by  
389 <sup>70</sup>), which was unlikely to be involved in the present task and did not include the striatum (see  
390 Methods). As expected, effective connectivity within the language network was not modulated by  
391  $Reinf_{TYPE}$  ( $F_{(1, 547)}=0.81$ ;  $p=0.37$ ), nor by  $tTIS_{TYPE}$  ( $F_{(2, 547)}=0.58$ ;  $p=0.56$ ), or by  $Reinf_{TYPE} \times tTIS_{TYPE}$   
392 ( $F_{(2, 547)}=0.45$ ;  $p=0.64$ ). Hence,  $tTIS$  and reinforcement-related changes in connectivity were  
393 consistent within the considered fronto-striatal networks and not observed in a control network  
394 unrelated to the task.

395 Notably, contrary to the BOLD results presented above, we did not find any correlations  
396 between the effects of  $tTIS_{80Hz}$  on connectivity and motor learning, neither in the motor (robust  
397 linear regression:  $tTIS_{80Hz} - tTIS_{Sham}$ :  $R^2=0.019$ ;  $p=0.48$ ;  $tTIS_{80Hz} - tTIS_{20Hz}$ :  $R^2=0.034$ ;  $p=0.54$ ) nor  
398 in the reward ( $tTIS_{80Hz} - tTIS_{Sham}$ :  $R^2=0.037$ ;  $p=0.46$ ;  $tTIS_{80Hz} - tTIS_{20Hz}$ :  $R^2<0.001$ ;  $p=0.75$ )  
399 network, suggesting some degree of independence between the effect of  $tTIS_{80Hz}$  on  
400 reinforcement motor learning and on effective connectivity.

401 Overall, these results highlight the ability of  $tTIS_{80Hz}$ , but not  $tTIS_{20Hz}$ , to modulate striatum  
402 to frontal cortex connectivity, depending on the presence of reinforcement. However, the absence  
403 of correlation with the behaviour suggests that this effect may not be directly associated to the  
404 detrimental effect of  $tTIS_{80Hz}$  on reinforcement motor learning or that  $tTIS_{80Hz}$ -related changes in  
405 striato-frontal communication were linked to other aspects of reinforcement learning not captured  
406 by our task.

### A. Motor network

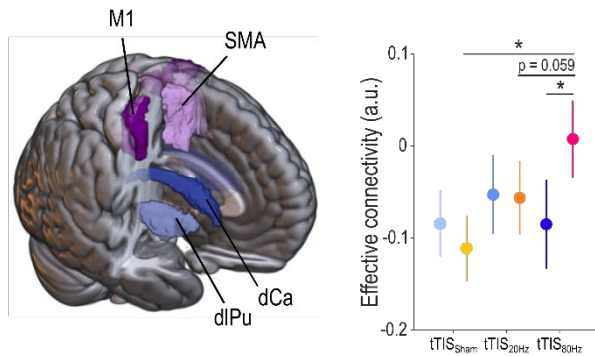

### B. Reward network

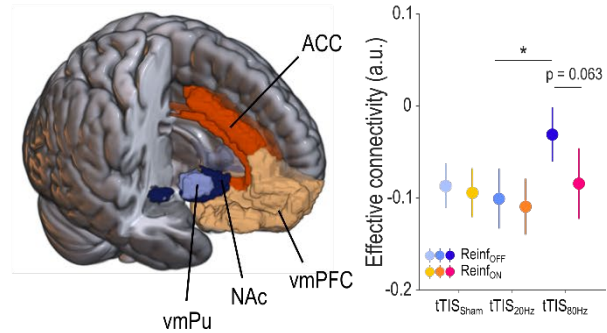

407

408 **Figure 4. Striatum to frontal cortex effective connectivity. A) Motor network.** On the  
409 left, 3D reconstruction of the masks used for the motor network (i.e., dorso-lateral putamen, dorsal  
410 caudate, M1, SMA). On the right, plot showing effective connectivity from motor striatum to motor  
411 cortex in the different experimental conditions. Note the increase of connectivity with tTIS<sub>80Hz</sub> in  
412 the presence of reinforcement. **B) Reward network.** On the left, 3D reconstruction of the masks  
413 used for the reward network (i.e., ventro-medial putamen, NAc, vmPFC, ACC). On the right, plot  
414 showing effective connectivity from motor striatum to motor cortex in the different experimental  
415 conditions. ROIs were defined based on the BNA atlas<sup>12</sup> \*: p<0.05. Data are represented as mean  
416 ± SE.  
417

## 418 **Neural effects of tTIS<sub>80Hz</sub> depend on impulsivity**

419 Determining individual factors that shape responsiveness to non-invasive brain stimulation  
420 approaches is a crucial step to better understand the mechanisms of action but also to envision  
421 stratification of patients in future clinical interventions<sup>71</sup>. A potential factor that could explain inter-  
422 individual differences in responsiveness to tTIS<sub>80Hz</sub> is the level of impulsivity. As such, impulsivity  
423 has been associated to changes of gamma oscillatory activity in the striatum of rats<sup>72</sup> and to the  
424 activity of fast-spiking interneurons in the striatum<sup>73,74</sup>, a neuronal population that is strongly  
425 entrained to gamma rhythms<sup>19,21</sup> and may therefore be particularly sensitive to tTIS<sub>80Hz</sub>. In a  
426 subsequent exploratory analysis, we asked if the neural effects of tTIS<sub>80Hz</sub> were associated to  
427 impulsivity levels, as evaluated by a well-established independent delay-discounting questionnaire  
428 performed at the beginning of the experiment<sup>75,76</sup>. Strikingly, a whole-brain analysis revealed that  
429 impulsivity was associated to the effect of tTIS<sub>80Hz</sub> on BOLD activity (with respect to tTIS<sub>20Hz</sub>)  
430 specifically in the left caudate nucleus (**Figure S7A, S7B, Table S4**). Moreover, the effect of  
431 tTIS<sub>80Hz</sub> on striatum to motor cortex connectivity reported above was negatively correlated to  
432 impulsivity both when contrasting tTIS<sub>80Hz</sub> with tTIS<sub>Sham</sub> (**Figure S7C, left**) and with tTIS<sub>20Hz</sub> (**Figure**  
433 **S7C, middle**). Such correlations were absent when contrasting tTIS<sub>20Hz</sub> with tTIS<sub>Sham</sub> (**Figure S7C,**  
434 **right**), as well as when considering the same contrasts in the reward instead of the motor network  
435 (see Supplementary materials for more details). Taken together, these results suggest that inter-  
436 individual variability in impulsivity might influence the neural responses to striatal tTIS<sub>80Hz</sub>.

### 437 **3. Discussion**

438  
439 In this study, we combined striatal tTIS with electric field modelling, behavioural and fMRI  
440 analyses to evaluate the causal role of the striatum in reinforcement learning of motor skills in  
441 healthy humans. tTIS<sub>80Hz</sub>, but not tTIS<sub>20Hz</sub>, disrupted the ability to learn from reinforcement  
442 feedback. This behavioural effect was associated to modulation of neural activity specifically in  
443 the striatum. As a second step, we show that tTIS<sub>80Hz</sub>, but not tTIS<sub>20Hz</sub>, increased the  
444 neuromodulatory influence of the striatum on connected frontal cortical areas involved in  
445 reinforcement motor learning. Finally, inter-individual variability in the neural effects of tTIS<sub>80Hz</sub>  
446 could be partially explained by impulsivity, suggesting that this trait may constitute a determinant  
447 of responsiveness to high gamma striatal tTIS. Overall, the present study shows for the first time  
448 that striatal tTIS can non-invasively modulate a striatal mechanism involved in reinforcement  
449 learning, opening new horizons for the study of causal relationships between deep brain structures  
450 and human behaviour.

451 We investigated the causal role of the human striatum in reinforcement learning of motor  
452 skills in healthy humans; a question that cannot be addressed with conventional non-invasive  
453 brain stimulation techniques. In particular, by stimulating at different frequencies, we aimed at  
454 dissociating striatal mechanisms involved in reinforcement and sensorimotor learning. In line with  
455 our main hypothesis, we found that striatal tTIS<sub>80Hz</sub> altered reinforcement learning of a motor skill.  
456 Such disruption was frequency- and reinforcement-specific: learning was not altered with striatal  
457 tTIS<sub>20Hz</sub> in the presence of reinforcement, or when striatal tTIS<sub>80Hz</sub> was delivered in the absence of  
458 reinforcement. The rationale to stimulate at high gamma frequency was based on previous work  
459 showing reinforcement-related modulation of gamma oscillations in the striatum<sup>19–21,24,26,72,77</sup> and  
460 in the frontal cortex<sup>77–80</sup>. Several neuronal mechanisms may contribute to the detrimental effect of  
461 tTIS<sub>80Hz</sub> on reinforcement motor learning. First, as tTIS<sub>80Hz</sub> consisted in a constant high gamma

462 oscillating field applied on the striatum, it may have perturbed the encoding of reinforcement  
463 information into high gamma oscillations<sup>19–21,25–27</sup>, preventing participants to learn the motor skill  
464 based on different outcomes. Put differently, tTIS<sub>80Hz</sub> may specifically saturate high gamma activity  
465 in the striatum preventing reinforcement-related modulations<sup>81</sup>. Moreover, because reinforcement  
466 motor learning likely engages synchronised activity in a network of regions including fronto-striatal  
467 loops, neuromodulation of a single node of the circuit may alter synchronisation of activity in the  
468 network<sup>81</sup> and the temporal coordination with interacting rhythms<sup>25</sup>. Finally, because we did not  
469 have access to electrophysiological recordings of oscillatory activity in the striatum, the applied  
470 stimulation was not personalised as it did not take into account the individual high gamma  
471 frequency peak associated to reward processing and the potential heterogeneity of gamma activity  
472 within the striatum<sup>24</sup>. Hence, tTIS<sub>80Hz</sub> may have resulted in a frequency mismatch between the  
473 endogenous high gamma activity and the externally imposed rhythm, that could paradoxically  
474 result in a reduction of neuronal entrainment, in particular when the frequency mismatch is  
475 relatively low<sup>82</sup>. Importantly, in contrast to striatal tTIS<sub>80Hz</sub>, we found that tTIS<sub>20Hz</sub> reduced learning,  
476 but only in the absence of reinforcement. This result fits well with the literature linking striatal beta  
477 oscillations to sensorimotor functions<sup>28,29,31,83–85</sup>. Taken together, an interpretation of these results  
478 is that different oscillations within the striatum support qualitatively distinct motor learning  
479 mechanisms with beta activity contributing mostly to sensory-based learning and high gamma  
480 activity being particularly important for reinforcement learning. This being said, it is important to  
481 note that because we do not have concurrent electrophysiological recordings within the striatum,  
482 we cannot be sure that the effects of tTIS<sub>20Hz</sub> and tTIS<sub>80Hz</sub> were related to frequency-specific  
483 interactions with beta or high gamma rhythms respectively, or rather resulted from different  
484 broadband responses when stimulating at these frequencies. Yet, these results still suggest that  
485 sensory- and reinforcement-based motor learning rely on partially different neural mechanisms, in  
486 line with previous literature<sup>8,9,61,68,86,87</sup>.

487            Interestingly, striatal tTIS also impaired tracking performance during training, irrespective  
488 of the presence of reinforcement. This frequency-dependent reduction of motor performance may  
489 be due to altered neuronal processing in the sensorimotor striatum that may lead to less fine-tuned  
490 motor control abilities<sup>88</sup>. Importantly though, tTIS did not modulate the ability of participants to  
491 benefit from real-time reinforcement feedback during motor performance. This suggests that  
492 striatal tTIS<sub>80Hz</sub> altered the beneficial effects of reinforcement on learning (as evaluated in Test  
493 conditions at Post-training), but not on motor performance (as evaluated during Training). Such  
494 dissociation between the effects of striatal tTIS<sub>80Hz</sub> on reinforcement-related gains in motor  
495 performance and learning may be explained by the fact that these two phases of the protocol  
496 probe different processes<sup>7,54,56,89–91</sup>. While improvement of motor performance with reinforcement  
497 relies on rapid feedback corrections based on expected outcomes<sup>67,92–95</sup>, reinforcement gains in  
498 learning (i.e., probed in Test conditions without reinforcement) may rather reflect the beneficial  
499 effect of reinforcement on the retention of motor memories<sup>5,7,54,90</sup>. This idea that mechanisms  
500 underlying performance changes in training and retention phases are partially different is well  
501 supported by previous motor learning literature<sup>6,8,96</sup>. For instance, in sensorimotor adaptation  
502 paradigms, the presence of reward boosts motor memory retention but not the adaptation process  
503 itself<sup>7,97</sup>, and M1 transcranial direct current stimulation modulates the effect of reward on retention  
504 but has no effect on the training phase<sup>90</sup>. Hence, a potential explanation for the present results is  
505 that striatal tTIS<sub>80Hz</sub> did not disrupt rapid motor corrections based on recent outcomes during  
506 training, but may rather alter the strengthening of the memory trace based on reinforcements<sup>6,7</sup>.  
507 Overall, these results are compatible with the view that specific patterns of oscillatory activity in  
508 the striatum are involved in motor control and learning processes<sup>31</sup>, and can be modulated with  
509 electrical stimulation<sup>69,98,99</sup>.

510            To better understand the neural effects and frequency-specificity of tTIS, we coupled  
511 striatal tTIS and task performance with simultaneous fMRI acquisition. The imaging results support



512 the view that the effect of tTIS<sub>80Hz</sub> on reinforcement learning of motor skills was indeed related to  
513 neuromodulation of the striatum. As such, when considering averaged BOLD activity, we found a  
514 general increase of striatal activity when reinforcement was provided<sup>11</sup>, but no effect of tTIS.  
515 Crucially though, the detrimental effect of tTIS<sub>80Hz</sub> on reinforcement learning was related to a  
516 specific modulation of activity in the caudate and putamen, providing evidence that the present  
517 behavioural effects were indeed driven by focal neuromodulation of the striatum (Figure 3).  
518 Interestingly, participants with stronger disruption of reinforcement learning at the behavioural  
519 level were also the ones exhibiting stronger suppression of striatal activity with tTIS<sub>80Hz</sub> (compared  
520 to tTIS<sub>20Hz</sub>), suggesting that tTIS-induced reduction of striatal activity is detrimental for  
521 reinforcement motor learning. Further analyses showed that tTIS<sub>80Hz</sub>, but not tTIS<sub>20Hz</sub>, increased  
522 the neuromodulatory influence of the striatum on frontal areas known to be important for motor  
523 learning and reinforcement processing<sup>96,100</sup>. More specifically, tTIS<sub>80Hz</sub> disrupted the task-related  
524 decrease in connectivity observed with tTIS<sub>Sham</sub> and tTIS<sub>20Hz</sub>, bringing connectivity closer to  
525 resting-state values. Interestingly, this effect depended on the type of network considered (reward  
526 vs. motor) and on the presence of reinforcement. Striatal tTIS<sub>80Hz</sub> coupled with reinforcement  
527 increased connectivity between the motor striatum and the motor cortex while it tended to have  
528 the opposite effect when considering the connectivity between limbic parts of the striatum and pre-  
529 frontal areas involved in reward processing (Figure 4). This result may reflect the differential  
530 influence of striatal tTIS on distinct subparts of the striatum, depending on their pattern of activity  
531 during the task<sup>52</sup>. As such, a recent study in non-human primates showed that tACS can have  
532 opposite effects on neuronal activity based on the initial entrainment of neurons to the target  
533 frequency<sup>82</sup>. Hence, the present differential effects of tTIS<sub>80Hz</sub> on motor and reward striato-frontal  
534 pathways may be due to different initial patterns of activity in these networks in the presence of  
535 reinforcement. Electrophysiological recordings with higher temporal resolution than fMRI are  
536 required to confirm or infirm this hypothesis. Overall, the present neuroimaging results support the

537 idea that the behavioural effects of striatal tTIS<sub>80Hz</sub> on reinforcement learning are associated to a  
538 selective modulation of striatal activity that influences striato-frontal communication.

539 The fact that we observed increased connectivity with tTIS<sub>80Hz</sub> and at the same time a  
540 disruption of behaviour may appear contradictory at first glance. Yet, multiple lines of evidence  
541 indicate that increases in connectivity are not necessarily beneficial for behaviour. For instance,  
542 the severity of motor symptoms in Parkinson's disease is associated with excessive connectivity  
543 in the beta band and reduction of such connectivity with treatment is associated to clinical  
544 improvement<sup>29,32</sup>. Moreover, there is evidence that excessive functional<sup>101,102</sup> as well as  
545 structural<sup>103,104</sup> connectivity in fronto-striatal circuits is associated to impulsivity. Hence, the  
546 increase in connectivity observed with tTIS<sub>80Hz</sub> appears to be compatible with the behavioural  
547 findings. This being said, contrary to the BOLD results, we did not find any correlation between  
548 the effects of tTIS<sub>80Hz</sub> on connectivity and on reinforcement motor learning, suggesting some  
549 degree of independence between these two effects. Future studies could aim at determining if  
550 tTIS<sub>80Hz</sub>-related changes in striato-frontal communication are linked to other aspects of reward  
551 processing, not captured by our reinforcement motor learning task.

552 From a methodological point of view, the present results provide new experimental support  
553 to the idea that the effects of tTIS are related to amplitude modulation of electric fields deep in the  
554 brain and not to the high frequency fields themselves, in line with recent work<sup>41,42,52</sup>. As such, the  
555 different behavioural and neural effects of striatal tTIS<sub>80Hz</sub> and tTIS<sub>20Hz</sub> despite comparable carrier  
556 frequencies (centered on 2kHz) indicate that temporal interference was indeed the driving force  
557 of the present effects. Moreover, disruption of reinforcement motor learning with tTIS<sub>80Hz</sub> (relative  
558 to tTIS<sub>20Hz</sub>) was specifically related to neuromodulation of the striatum, where the amplitude of the  
559 tTIS field was highest according to our simulations (see<sup>51,53</sup> for recent validations of comparable  
560 simulations in cadavers experiments). Hence, we believe that the frequency- and reinforcement-  
561 dependent tTIS effects reported here cannot be explained by direct modulation of neural activity

562 by the high frequency fields. Yet, disentangling the neural effects of the low-frequency envelope  
563 and the high frequency carrier appears as an important next step to better characterise the  
564 mechanisms underlying tTIS<sup>47</sup>. We also note that the tTIS field strengths achieved according to  
565 our simulations (in the range of 0.5-0.6 V/m) were sufficient to induce behavioral and neural  
566 effects, in line with recent data<sup>52,53</sup> (see also <sup>48</sup>). Determining the minimum effective dose for tTIS  
567 is an important line of future research given recent simulation results suggesting that stimulation  
568 via an amplitude modulation with high frequency carrier signals (such as arising during tTIS) may  
569 require higher dosages compared to conventional electrical stimulation with low frequencies (such  
570 as during tACS), likely due to the low-pass filtering properties of neurons<sup>43,105</sup>.

571 Finally, the strength of the behavioural effects of tTIS can be considered small to medium<sup>106</sup>  
572 (d=0.2-0.5). We note that these effect sizes are consistent with studies applying other types of  
573 non-invasive brain stimulation in healthy young adults, both in the context of motor learning (see  
574 <sup>107</sup> for a meta-analysis), and reward tasks (e.g., <sup>108,109</sup>), despite the much longer stimulation time  
575 used in these studies (between 3 and 20 times longer). Overall, albeit moderate, we believe that  
576 the present effect sizes are relevant and consistent with what can be expected from the non-  
577 invasive brain stimulation literature.

578

## 579 **Limitations**

580 The present study includes some limitations that we would like to acknowledge. First, at  
581 the imaging level, we did not find a significant effect of reinforcement at the whole-brain level. This  
582 might be due to the short duration of the task (6x40s), combined with the fact that we did not  
583 couple reinforcement to monetary incentives, a manipulation known to strongly boost striatal  
584 activity in the context of motor learning<sup>18</sup>. Yet, when considering BOLD activity in the striatal ROIs,  
585 we did find a significant effect of reinforcement, suggesting that our experimental manipulation did  
586 increase striatal activity but that the strength of the effect was insufficient to survive at the whole-

587 brain level. Second, we did not find any effect of tTIS when considering averaged BOLD activity.  
588 Again, the short duration of the blocks may contribute to this non-significant effect. Another  
589 possible interpretation is that the effect of tTIS on BOLD activity is not uniform across participants  
590 as it likely depends on individual anatomy and function of the targeted brain region, as observed  
591 for other non-invasive brain stimulation techniques<sup>110</sup>. Consistently, we found a correlation  
592 between levels of impulsivity and the neural effects of tTIS<sub>80Hz</sub> (both BOLD and connectivity, Figure  
593 S7). Importantly though, when including learning as a behavioral regressor we did find significant  
594 clusters of correlation specifically in the striatum (Figure 3), suggesting that the behavioural effects  
595 were indeed related to modulation of activity in the target region. Notably, this result was significant  
596 when contrasting tTIS<sub>80Hz</sub> to the active control (tTIS<sub>20Hz</sub>), but not to tTIS<sub>Sham</sub>. Overall, we believe  
597 that the fMRI data does provide interesting support that the behavioural effects of the stimulation  
598 were indeed related to modulation of neural activity in the striatum, also in line with the present  
599 simulations on realistic head models (Figure 1) and the connectivity results (Figure 4). This idea  
600 is also in agreement with another recent study investigating the effects of tTIS on motor sequence  
601 learning<sup>52</sup>. Notably though, a limitation of the present dataset is the very short duration of  
602 stimulation and imaging for each experimental condition, that may explain some inconsistencies  
603 in the results. Hence, following this first proof-of-concept study showing robust behavioural effects  
604 and related neural changes, future studies including longer fMRI and stimulation sessions are  
605 required to further confirm these results.

606 Finally, within the present study the computational modelling was performed on a realistic,  
607 detailed head model (i.e., the MIDA model<sup>59</sup>, see Methods). One limitation of this approach is that  
608 the electric field simulations do not take individual structural information into account. Such  
609 individual modeling would require information on brain anisotropy, an aspect that is likely to  
610 significantly influence tTIS exposure<sup>44,111</sup>. However, in the present study diffusion MRI to evaluate

611 fractional anisotropy was not acquired. Future studies including diffusion MRI data will allow for  
612 personalised modelling, paving the way for individualised tTIS informed by brain structure<sup>53</sup>.

613

## 614 **Conclusion**

615 The present findings show for the first time the ability of non-invasive striatal tTIS to  
616 interfere with reinforcement learning in humans through a selective modulation of striatal activity  
617 and support the causal functional role of the human striatum in reinforcement motor learning. This  
618 deep brain stimulation was well tolerated and compatible with efficient blinding, suggesting that  
619 tTIS provides the exciting option to circumvent the steep depth-focality trade-off of current non-  
620 invasive brain stimulation approaches in a safe and effective way. Overall, tTIS opens new  
621 possibilities for the study of causal brain-behaviour relationships and for the treatment of neuro-  
622 psychiatric disorders associated to alterations of deep brain structures.

## 623 **4. Methods**

### 624 **4.1. Participants**

625  
626 A total of 48 right-handed healthy volunteers participated in the study. 24 participants were  
627 enrolled for the main tTIS study (15 women,  $25.3 \pm 0.7$  years old; mean  $\pm$  SE). Another group of  
628 24 volunteers participated in the behavioural control experiment (Figure S2, 14 women,  $24.2 \pm 0.5$   
629 years old). Handedness was determined via a shortened version of the Edinburgh Handedness  
630 inventory<sup>112</sup> (laterality index =  $89.3 \pm 2.14\%$  for the main study and  $86.4 \pm 2.51\%$  for the control  
631 experiment). None of the participants suffered from any neurological or psychiatric disorder, nor  
632 taking any centrally-acting medication (see Supplementary Materials for a complete list of  
633 exclusion criteria). All participants gave their written informed consent in accordance with the  
634 Declaration of Helsinki and the Cantonal Ethics Committee Vaud, Switzerland (project number  
635 2020-00127). Finally, all participants were asked to fill out a delay-discounting monetary choice  
636 questionnaire<sup>113</sup>, which evaluates the propensity of subjects to choose smaller sooner rewards  
637 over larger later rewards, a preference commonly associated to choice impulsivity<sup>75,114</sup>.

638

### 639 **4.2. Experimental procedures**

640  
641 The study employed a randomised, double-blind, sham-controlled design. Following  
642 screening and inclusion, participants were invited to a single experimental session including  
643 performance of a motor learning task with concurrent transcranial electric Temporal Interference  
644 stimulation (tTIS) of the striatum and functional magnetic resonance imaging (fMRI). Overall,  
645 participants practiced 6 blocks of trials, that resulted from the combination of two reinforcement  
646 feedback conditions (Reinf<sub>TYPE</sub>: Reinf<sub>ON</sub> or Reinf<sub>OFF</sub>) with three types of striatal stimulation  
647 (tTIS<sub>TYPE</sub>: tTIS<sub>Sham</sub>, tTIS<sub>20Hz</sub> or tTIS<sub>80Hz</sub>).

648

#### 649 4.2.1. Motor learning task

650

##### 651 4.2.1.1. General aspects

652

653 Participants practiced an adaptation of a widely used force-tracking motor task<sup>54,55</sup> with a  
654 fMRI-compatible fiber optic grip force sensor (Current designs, Inc., Philadelphia, PA, USA)  
655 positioned in their right hand. The task was developed on Matlab 2018 (the Mathworks, Natick,  
656 Massachusetts, USA) exploiting the Psychophysics Toolbox extensions<sup>115,116</sup> and was displayed  
657 on a computer screen with a refresh rate of 60 Hz. The task required participants to squeeze the  
658 force sensor to control a cursor displayed on the screen. Increasing the exerted force resulted in  
659 the cursor moving vertically and upward in a linear way. Each trial started with a preparatory period  
660 in which a sidebar appeared at the bottom of the screen (**Figure 1A**). After a variable time interval  
661 (0.9 to 1.1 s), a cursor (black circle) popped up in the sidebar and simultaneously a target (grey  
662 larger circle with a cross in the middle) appeared, indicating the start of the movement period.  
663 Subjects were asked to modulate the force applied on the transducer to keep the cursor as close  
664 as possible to the center of the target. The target moved in a sequential way along a single vertical  
665 axis for 7 s. The maximum force required (i.e., the force required to reach the target when it was  
666 in the uppermost part of the screen;  $\text{MaxTarget}_{\text{Force}}$ ) was set at 4% of maximum voluntary  
667 contraction (MVC) evaluated at the beginning of the experiment. This low force level was chosen  
668 based on pilot experiments to limit muscular fatigue. Finally, each trial ended with a blank screen  
669 displayed for 2 s before the beginning of the next trial.

670

##### 671 4.2.1.2. Trial types and reinforcement manipulation

672

673           During the experiment, participants were exposed to different types of trials (**Figure 1A,**  
674 **Video S1**). In Test trials, the cursor remained on the screen and the target was consistently  
675 displayed in grey for the whole duration of the trial. These trials served to evaluate Pre- and Post-  
676 training performance for each block, without any disturbance. In Reinf<sub>ON</sub> and Reinf<sub>OFF</sub> trials (used  
677 during Training only), we provided only partial visual feedback to the participants in order to  
678 increase the impact of reinforcement on learning<sup>4,56–58</sup>. As such, the cursor was only intermittently  
679 displayed during the trial: it was always displayed in the first second of the trial, and then  
680 disappeared for a total of 4.5 s randomly split on the remaining time by bits of 0.5 s. The cursor  
681 was therefore displayed 35.7% of the time during these trials (2.5 s over the 7 s trial). Importantly,  
682 contrary to the cursor, the target always remained on the screen for the whole trial and participants  
683 were instructed to continue to track the target even when the cursor was away.

684           In addition to this visual manipulation, in Reinf<sub>ON</sub> trials, participants also trained with  
685 reinforcement feedback indicating success or failure of the tracking in real time. As such,  
686 participants were informed that, during these trials, the color of the target would vary as a function  
687 of their performance: the target was displayed in green when tracking was considered as  
688 successful and in red when it was considered as failure. Online success on the task was  
689 determined based on the Error, defined as the absolute force difference between the force  
690 required to be in the center of the target and the exerted force<sup>4,54–56</sup>. The Error, expressed in  
691 percentage of MVC, was computed for each frame refresh and allowed to classify a sample as  
692 successful or not based on a closed-loop reinforcement schedule<sup>8</sup>. More specifically, for each  
693 training trial, a force sample (recorded at 60 Hz, corresponding to the refresh rate of the monitor)  
694 was considered as successful if the computed Error was below the median Error over the 4  
695 previous trials at this specific sample. Put differently, to be successful, participants had to  
696 constantly beat their previous performance. This closed-loop reinforcement schedule allowed us  
697 to deliver consistent reinforcement feedback across individuals and conditions (see control



698 analysis on success rates in the Supplementary materials), while maximizing uncertainty on the  
699 presence of reinforcement, an aspect that is crucial for efficient reinforcement motor learning<sup>117</sup>.  
700 Notably, in addition to this closed-loop design, samples were also considered as successful if the  
701 cursor was very close to the center of the target (i.e., within one radius around the center,  
702 corresponding to an Error below 0.2% of MVC). This was done to prevent any conflict between  
703 visual information (provided by the position of the cursor relative to the target) and reinforcement  
704 feedback (provided by the color of the target), which could occur in situations of extremely good  
705 performance (when the closed-loop Error cut-off is below 0.2% of MVC).

706 As a control, Reinf<sub>OFF</sub> trials were similar to Reinf<sub>ON</sub> trials with the only difference that the  
707 displayed colors were either cyan or magenta, and were generated randomly. Participants were  
708 explicitly told that, in this condition, colors were displayed randomly and could be ignored. The  
709 visual properties of the target in the Reinf<sub>OFF</sub> condition were designed to match the Reinf<sub>ON</sub>  
710 condition in terms of relative luminance (cyan: RGB = [127.5 242.1 255] matched to green: [127.5  
711 255 127.5] and magenta: [211.7 127.5 255] to red: [255 127.5 127.5]) and average frequency of  
712 change in colors (i.e., the average number of changes in colors divided by the total duration of a  
713 trial, see Supplementary materials).

714 Notably, in this task, Training trials differed from Test trials regarding not only the color of  
715 the target (red/green or cyan/magenta in Training trials and grey in Test trials) but also the visual  
716 feedback experienced (partial and full visual feedback in Training and Test trials, respectively).  
717 This choice was motivated by several reasons. First, we wanted to evaluate learning in the  
718 classical, unperturbed, version of the force-tracking task<sup>54,55</sup>, which is compatible with clinical  
719 translation. Second, based on additional behavioural data on another group of participants (n =  
720 24, see Figure S2), we found that significant effects of reinforcement on learning were observed  
721 only when training was performed with partial visual feedback (displayed on 35.7% of the trial  
722 time, as in the present study), in line with previous results<sup>57,62</sup>. However, this additional study also

723 revealed very limited improvement of performance during training with partial visual feedback,  
724 potentially due to ceiling effects on performance in this condition. Yet, the improvement of  
725 performance when comparing the Pre and Post-training assessments strongly suggested that  
726 practicing the task with partial visual feedback still induced significant learning of the skill. Finally,  
727 the change in visual feedback between Training and Post-training was the same in all  
728 experimental conditions; this aspect of the task is therefore unlikely to explain the reinforcement  
729 as well as the stimulation effects reported here.

730 Even though our study focused on reinforcement motor learning, it is worth mentioning that  
731 other learning mechanisms such as error-based or strategic processes are likely to be also  
732 engaged during the force-tracking task and may have recruited other brain regions beyond the  
733 striatum (Spampinato and Celnik, 2020). Notably though, our protocol was specifically designed  
734 to compare in the same individuals, learning in Reinf<sub>ON</sub> and Reinf<sub>OFF</sub> conditions while keeping the  
735 other parameters of the task constant, to specifically isolate the contribution of reinforcement  
736 processes in motor learning.

737

#### 738 4.2.1.3. Motor learning protocol

739

740 After receiving standardised instructions about the force-tracking task, participants  
741 practiced 5 blocks of familiarization (total of 75 trials) without tTIS. The first block of familiarization  
742 included 20 trials with the target moving in a regular fashion (0.5 Hz sinusoid). Then, in a second  
743 block of familiarization, participants performed 35 trials of practice with an irregular pattern, with  
744 the same properties as the training patterns (see below). Finally, we introduced the reinforcement  
745 manipulation and let participants perform 2 short blocks (8 trials each) including Reinf<sub>ON</sub> and  
746 Reinf<sub>OFF</sub> trials. These four first blocks of familiarization were performed outside the MRI  
747 environment. A last familiarization block (4 trials) was performed after installation in the scanner,

748 to allow participants to get used to performing the task in the MRI. This long familiarization allowed  
749 participants to get acquainted with the use of the force sensor, before the beginning of the  
750 experiment.

751 During the main part of the experiment, participants performed 6 blocks of trials in the MRI  
752 with concurrent striatal tTIS (**Figure 1B**). Each block was composed of 4 Pre-training trials  
753 followed by 24 Training and 8 Post-training trials. Pre- and Post-training trials were performed in  
754 Test conditions, without tTIS and were used to evaluate motor learning. Training trials were  
755 performed with or without reinforcement feedback and with concomitant striatal tTIS and were  
756 used as a proxy of motor performance. During Training, trials were interspersed with 25 s resting  
757 periods every 4 trials (used for fMRI contrasts, see below). The order of the 6 experimental  
758 conditions was pseudo-randomised across participants: the 6 blocks were divided into 3 pairs of  
759 blocks with the same tTIS condition and each pair was then composed of one Reinf<sub>ON</sub> and one  
760 Reinf<sub>OFF</sub> block. Within this structure, the order of the tTIS<sub>TYPE</sub> and Reinf<sub>TYPE</sub> conditions were  
761 balanced among the 24 participants. Hence, this randomisation allowed us to ensure that any  
762 order effect that may arise from the repetition of the learning blocks would have the same impact  
763 on each experimental condition (e.g., 4 subjects experienced tTIS<sub>80Hz</sub> - Reinf<sub>ON</sub> in the first block, 4  
764 other subjects in the second block, 4 in the third block etc.).

765 As mentioned above, the protocol involved multiple evaluations of motor learning within  
766 the same experimental session. In order to limit carry-over effects from one block to the following,  
767 each experimental block was associated to a different pattern of movement of the target (**Figure**  
768 **S1**). Put differently, in each block, participants had to generate a new pattern of force to  
769 successfully track the target. To balance the patterns' difficulty, they all consisted in the summation  
770 of 5 sinusoids of variable frequency (range: 0.1-1.5 Hz) that presented the following properties: a)  
771 Average force comprised between 45 and 55% of the MaxTarget<sub>Force</sub>; b) Absolute average  
772 derivative comprised between 54 and 66 % of the MaxTarget<sub>Force</sub>/s; c) Number of peaks = 14

773 (defined as an absolute change of force of at least 1% of  $\text{MaxTarget}_{\text{Force}}$ ). These parameters were  
774 determined based on pilot experiments to obtain a relevant level of difficulty for young healthy  
775 adults and consistent learning across the different patterns.

776  
777 4.2.2. Transcranial Electric Temporal Interference Stimulation (tTIS) applied to the  
778 striatum

779  
780 4.2.2.1. General concept

781  
782 Transcranial temporal interference stimulation (tTIS) is an innovative non-invasive brain  
783 stimulation approach, in which two or more independent stimulation channels deliver high-  
784 frequency currents in the kHz range (oscillating at  $f_1$  and  $f_1 + \Delta f$ ; **Figure 1C**). These high-  
785 frequency currents are assumed to be too high to effectively modulate neuronal activity<sup>41,50,118</sup>.  
786 Still, by applying a small shift in frequency, they result in a modulated electric field with the  
787 envelope oscillating at the low-frequency  $\Delta f$  (target frequency) where the two currents overlap.  
788 The peak of the modulated envelope amplitude can be steered towards specific areas located  
789 deep in the brain, by tuning the position of the electrodes and current ratio across stimulation  
790 channels<sup>41</sup> (**Figure 1C, 1D**). Based on these properties, tTIS has been shown to be able to focally  
791 target activity of deep structures in rodents, without engaging overlying tissues<sup>41</sup>. Here, we applied  
792 temporal interference stimulation transcranially via surface electrodes applying a low-intensity,  
793 sub-threshold protocol following the currently accepted cut-offs and safety guidelines for low-  
794 intensity transcranial electric stimulation in humans<sup>119</sup>.

795  
796 4.2.2.2. Stimulators

797

798 The currents for tTIS were delivered by two independent DS5 isolated bipolar constant  
799 current stimulators (*Digitimer Ltd, Welwyn Garden City, UK*). The stimulation patterns were  
800 generated using a custom-based Matlab graphical user interface and transmitted to the current  
801 sources using a standard digital-analog converter (*DAQ USB-6216, National Instruments, Austin,*  
802 *TX, USA*). Finally, an audio transformer was added between stimulators and subjects, in order to  
803 avoid possible direct current accumulation.

804

#### 805 4.2.2.3. Stimulation protocols

806

807 During the 6 Training blocks, we applied three different types of striatal tTIS (2 blocks  
808 each): a stimulation with a tTIS envelope modulated at 20Hz (tTIS<sub>20Hz</sub>), a stimulation with a tTIS  
809 envelope modulated at 80Hz (tTIS<sub>80Hz</sub>) and a sham stimulation (tTIS<sub>Sham</sub>). For tTIS<sub>20Hz</sub>, the  
810 posterior stimulation channel (TP7-TP8, see below) delivered a 1.99 kHz stimulation while the  
811 anterior one delivered a 2.01 kHz ( $\Delta f = 20$  Hz). For tTIS<sub>80Hz</sub>, the posterior and anterior channels  
812 delivered 1.96 kHz and 2.04 kHz, respectively ( $\Delta f = 80$  Hz). Hence in both conditions, the high  
813 frequency component was comparable and the only difference was  $\Delta f$ . During each block, tTIS  
814 was applied for 5 minutes (6 x 50 s) during Training. Each stimulation period started and ended  
815 with currents ramping-up and -down, respectively, for 5 s. tTIS was applied only while participants  
816 were performing the motor task and not during resting periods or Pre- and Post-training  
817 assessments. Finally, tTIS<sub>Sham</sub> consisted in a ramping-up (5 s) immediately followed by a ramping-  
818 down (5 s) of 2 kHz currents delivered without any shift in frequency. This condition allowed us to  
819 mimic the sensations experienced during the active conditions tTIS<sub>20Hz</sub> and tTIS<sub>80Hz</sub>, while  
820 delivering minimal brain stimulation (Figure S5). A trigger was sent 5 seconds before the beginning  
821 of each trial in order to align the beginning of the task and the beginning of the frequency shift  
822 after the ramp-up. Other tTIS parameters were set as follows: current intensity per stimulation

823 channel = 2 mA (baseline-to-peak), electrode type: round, conductive rubber with conductive  
824 cream/paste, electrode size = 3 cm<sup>2</sup> (see ContES checklist in Supplementary materials for more  
825 details).

826 The stimulation was applied within the MRI environment (Siemens 3T MAGNETOM  
827 Prisma; Siemens Healthcare, Erlangen, Germany) using a standard RF filter module and MRI-  
828 compatible cables (*neuroConn GmbH, Ilmenau, Germany*). The technological, safety and noise  
829 tests, and methodological factors can be found in Supplementary materials (Table S1) and are  
830 based on the ContES Checklist <sup>120</sup>.

831

#### 832 4.2.2.4. Modelling

833

834 Electromagnetic simulations were carried out to identify optimised electrode placement  
835 and current steering parameters. Simulations were performed using the MIDA head model<sup>59</sup>, a  
836 detailed anatomical head model featuring >100 distinguished tissues and regions that was derived  
837 from multi-modal image data of a healthy female volunteer. Importantly, for brain stimulation  
838 modelling, the model differentiates different scalp layers, skull layers, grey and white matter,  
839 cerebrospinal fluid, and the dura and accounts for electrical conductivity anisotropy and neural  
840 orientation based on diffusion tensor imaging (DTI) data. Circular electrodes (radius = 0.7 cm)  
841 were positioned on the skin according to the 10-10 system and the electromagnetic exposure was  
842 computed using the ohmic-current-dominated electro-quasistatic solver from Sim4Life v5.0 (ZMT  
843 Zurich MedTech AG, Switzerland), which is suitable due to the dominance of ohmic currents over  
844 displacement currents and the long wavelength compared with the simulation domain<sup>121</sup>. Dielectric  
845 properties were assigned based on the IT'IS Tissue Properties Database v4.0<sup>122</sup>. Rectilinear  
846 discretization was performed, and grid convergence as well as solver convergence analyses were  
847 used to ensure negligible numerical uncertainty, resulting in a grid that included more than 54M

848 voxels. Dirichlet voltage boundary conditions, and then current normalization were applied. The  
849 electrode-head interface contact was treated as ideal. tTIS exposure was quantified according to  
850 the maximum modulation envelope magnitude formula from Grossman et al., (2017)<sup>41</sup>. Then, a  
851 sweep over 960 permutations of the four electrode positions was performed, considering  
852 symmetric and asymmetric montages with parallel (sagittal and coronal) or crossing current paths,  
853 while quantifying bilateral striatum (putamen [BNA regions 225, 226, 229, 230], caudate [BNA  
854 regions 219, 220, 227, 228] and nucleus accumbens [BNA regions 223, 224]) exposure  
855 performance according to three metrics: a) target exposure strength, b) focality ratio (the ratio of  
856 target tissue volume above threshold compared to the whole-brain tissue volume above threshold,  
857 a measure of stimulation selectivity), and c) activation ratio (percentage of target volume above  
858 threshold with respect to the total target volume, a measure of target coverage). We defined the  
859 threshold as the 98<sup>th</sup> volumetric iso-percentile level of the tTIS. From the resulting Pareto-optimal  
860 front, two configurations stood out particularly: one that maximised focality and activation (AF3 -  
861 AF4, P7 - P8) and a second one that accepts a reduction of these two metrics by a quarter, while  
862 increasing the target exposure strength by more than 50% (F3-F4, TP7-TP8). This last montage  
863 was selected, to ensure sufficient tTIS exposure in the striatum<sup>52</sup> (Figure 1C, 1D).

864

#### 865 4.2.2.5. Electrode positioning and evaluation of stimulation-associated sensations

866

867 Based on the modelling approach described above, we defined the stimulation electrode  
868 positions in the framework of the EEG 10-10 system<sup>123</sup>. The optimal montage leading in terms of  
869 target (i.e. the bilateral striatum) exposure strength and selectivity, was composed of the following  
870 electrodes: F3, F4, TP7 and TP8. Their locations were marked with a pen on the scalp and, after  
871 skin preparation (cleaned with alcohol), round conductive rubber electrodes of 3 cm<sup>2</sup> were placed  
872 adding a conductive paste (*Ten20, Weaver and Company, Aurora, CO, USA* or *AbraIyt HiCl,*  
873 *Easycap GmbH, Woerthsee-Ettersschlag, Germany*) as an interface to the skin. Electrodes were

874 held in position with tape and cables were oriented towards the top in order to allow good  
875 positioning inside the scanner. Impedances were checked and optimised until they were below 20  
876 k $\Omega$  <sup>48</sup>. Once good contact was obtained, we tested different intensities of stimulation for each  
877 stimulation protocol in order to familiarise the participants with the perceived sensations and to  
878 systematically document them. tTIS<sub>Sham</sub>, tTIS<sub>20Hz</sub> and tTIS<sub>80Hz</sub> were applied for 20 seconds with the  
879 following increasing current amplitudes per channel: 0.5 mA, 1 mA, 1.5 mA and 2 mA. Participants  
880 were asked to report any kind of sensation and, if a sensation was felt, they were asked to grade  
881 the intensity from 1 to 3 (light to strong) as well as give at least one adjective to describe it (Figure  
882 S5). Following this step, cables were removed to be replaced by MRI-compatible cables and a  
883 bandage was added to apply pressure on the electrodes and keep them in place. An impedance  
884 check was repeated in the MRI right before the training and then again at the end of all recordings.

885

#### 886 4.2.3. MRI data acquisition

887

888 Structural and functional images were acquired using a 3T MAGNETOM PRISMA scanner  
889 (*Siemens, Erlangen, Germany*). T1-weighted images were acquired via the 3D MPRAGE  
890 sequence with the following parameters: TR = 2.3 s; TE = 2.96 ms; flip angle = 9°; slices = 192;  
891 voxel size = 1 × 1 × 1 mm, FOV = 256 mm. Anatomical T2 images were also acquired with the  
892 following parameters: TR = 3 s; TE = 409 ms; flip angle = 120°; slices = 208; voxel size = 0.8 ×  
893 0.8 × 0.8 mm, FOV = 320 mm. Finally, functional images were recorded using Echo-Planar  
894 Imaging (EPI) sequences with the following parameters: TR = 1.25 s; TE = 32 ms; flip angle =  
895 58°; slices = 75; voxel size = 2 × 2 × 2 mm; FOV = 112 mm.

896

### 897 4.3. Data and statistical analyses

898



899 Data and statistical analyses were carried out with Matlab 2018a (the Mathworks, Natick,  
900 Massachusetts, USA) and the R software environment for statistical computing and graphics (R  
901 Core Team 2021, Vienna, Austria). Robust linear regressions were fitted with the Matlab function  
902 `robustfit`. Linear mixed models (LMM) were fitted using the `lmer` function of the `lme4` package in R  
903 <sup>124</sup>. As random effects, we added intercepts for participants and block. Normality of residuals, and  
904 homoscedasticity of the data were systematically checked, and logarithmic transformations were  
905 applied when necessary (i.e., when skewness of the residuals' distribution was not comprised  
906 between - 2 and 2<sup>125</sup> or when homoscedasticity was violated based on visual inspection). To  
907 mitigate the impact of isolated influential data points on the outcome of the final model, we used  
908 tools of the `influence.ME` package to detect and remove influential cases based on the following  
909 criterion:  $\text{distance} > 4 * \text{mean distance}$ <sup>126</sup>. Statistical significance was determined using the `anova`  
910 function with Satterthwaite's approximations of the `lmerTest` package<sup>127</sup>. For specific post-hoc  
911 comparisons we conducted pairwise comparisons by computing estimated marginal means with  
912 the `emmeans` package with Tukey adjustment of p-values<sup>128</sup>. Standardised effect size measures  
913 were obtained using the `eff_size` function of the `emmeans` package<sup>129</sup>. The level of significance  
914 was set at  $p < 0.05$ .

915

916

#### 917 4.3.1. Behavioural data

918

##### 919 4.3.1.1. Evaluation of motor learning

920

921 The main goal of the present study was to evaluate the influence of striatal tTIS on  
922 reinforcement motor learning. To do so, we first removed trials, in which participants did not react  
923 within 1 s after the appearance of the cursor and target, considering that these extremely long  
924 preparation times may reflect significant fluctuations in attention<sup>130</sup>. This occurred extremely rarely  
925 (0.52 % of the whole data set). For each subject and each trial, we then quantified the tracking

926 Error as the absolute force difference between the applied and required force as done  
927 previously<sup>4,54,56</sup>. Tracking performance during Training and Post-training trials were then  
928 normalised according to subjects' initial level by expressing the Error data in percentage of the  
929 average Pre-training Error for each block. In order to test our main hypothesis predicting specific  
930 effects of striatal tTIS on reinforcement motor learning, we performed a LMM on the Post-training  
931 data with  $tTIS_{TYPE}$  and  $Reinf_{TYPE}$  as fixed effects. We then also ran the same analysis on the  
932 Training data, to evaluate if striatal tTIS also impacted on motor performance, while stimulation  
933 was being delivered.

934 As a control, we checked that initial performance at Pre-training was not different between  
935 conditions with a LMM on the Error data obtained at Pre-training. Again,  $tTIS_{TYPE}$  and  $Reinf_{TYPE}$   
936 were considered as fixed effects. Finally, another LMM was fitted with the fixed effect  $tTIS_{TYPE}$  to  
937 verify that the amount of positive reinforcement (as indicated by a green target) in the  $Reinf_{ON}$   
938 blocks was similar across  $tTIS_{TYPES}$ .

939

#### 940 4.3.2. fMRI data

941

##### 942 4.3.2.1. Imaging Preprocessing

943

944 We analyzed functional imaging data using Statistical Parametric Mapping 12 (*SPM12*;  
945 *The Wellcome Department of Cognitive Neurology, London, UK*) implemented in MATLAB  
946 R2018a (*Mathworks, Sherborn, MA*). All functional images underwent a common preprocessing  
947 including the following steps: slice time correction, spatial realignment to the first image,  
948 normalization to the standard MNI space and smoothing with a 6 mm full-width half-maximal  
949 Gaussian kernel. T1 anatomical images were then co-registered to the mean functional image and  
950 segmented. This allowed to obtain bias-corrected gray and white matter images, by normalizing  
951 the functional images via the forward deformation field. To select subjects with acceptable level of  
952 head movement, framewise displacement was calculated for each run. A visual check of both non-

953 normalised and normalised images was performed in order to ensure good preprocessing quality.  
954 Finally, possible tTIS-related artifacts were investigated based on signal to noise ratio maps (see  
955 below).

956

#### 957 4.3.2.2. Signal to Noise Ratio

958

959 Total signal to noise ratio (tSNR) maps were computed to check the presence of possible  
960 artifacts induced by the electrical stimulation. The values were calculated per each voxel by  
961 dividing the mean of the voxel time series by its standard deviation. Spherical regions of interest  
962 were then defined both underneath the tTIS electrodes and at 4 different locations, distant from  
963 the electrodes as a control. The center of each spherical ROI was obtained by projecting the  
964 standard MNI coordinates of each electrode on the scalp<sup>131</sup> toward the center of the brain. After  
965 visual inspection of the ROIs, average tSNR maps were extracted within each sphere. A LMM was  
966 used to compare the average SNR underneath the electrodes versus the control regions and  
967 between stimulation protocols. The results of this analysis are presented in Supplementary  
968 materials (Figure S8).

969

#### 970 4.3.2.3. Task-based BOLD activity analysis

971

972 A general linear model was implemented at the single-subject level in order to estimate  
973 signal amplitude. Eight regressors were included in the model: 6 head motion parameters  
974 (displacement and rotation) and normalised time series within the white matter and the  
975 corticospinal fluid. Linear contrasts were then computed to estimate specific activity during the  
976 motor task with respect to resting periods. Functional activation was also extracted within specific  
977 ROIs individually defined based on structural images. More specifically, the Freesurfer recon-all  
978 function was run based on the structural T1w and T2w images

979 (<https://surfer.nmr.mgh.harvard.edu/>). The BNA parcellation was derived on the individual subject  
980 space and the selected ROIs were then co-registered to the functional images and normalised to  
981 the MNI space. BOLD activity within the individual striatal masks was averaged and compared  
982 between different striatal nuclei namely the putamen (BNA regions 225, 226, 229, 230), caudate  
983 (BNA regions 219, 220, 227, 228) and nucleus accumbens (BNA regions 223, 224). Comparison  
984 between conditions were presented for uncorrected voxel-wise FWE,  $p=0.001$  and multiple  
985 comparison corrected at the cluster level to reduce False Discovery Rate (FDR),  $p=0.05$ .

986

987

#### 988 4.3.2.4. Effective connectivity analyses

989

990 As an additional investigation, we computed task-modulated effective functional  
991 connectivity by means of the CONN toolbox 2021a ([www.nitrc.org/projects/conn](http://www.nitrc.org/projects/conn),  
992 RRID:SCR\_009550) running in Matlab R2018a (*Mathworks, Sherborn, MA*). An additional  
993 denoising step was added by applying a band-pass filtering from 0.01 to 0.1 Hz and by regressing  
994 potential confounders (white matter, CSF and realignment parameters). After that, generalized  
995 Psycho-Physiological Interactions (gPPI) connectivity was extracted within specific pre-defined  
996 customised sub-networks: a reward and a motor network. gPPI evaluates condition-specific  
997 changes in effective connectivity, defined as the directed effect that one brain region has on  
998 another under some model of neuronal coupling (Friston, 1994). In particular, gPPI considers a  
999 series of equations in which activity in a ROI (pre-defined frontal areas in our case) depends on a  
1000 specific condition (the 'psychological' factor) and on activity in the seed region (striatum here, the  
1001 'physiological' factor). By solving these equations, it is possible to determine a coefficient that  
1002 represents task-modulation of effective connectivity<sup>132</sup>. Importantly, task-related changes in

1003 effective connectivity are expressed relative to rest, and therefore values closer to 0 reflect a  
1004 connectivity similar to resting state.

1005

1006         The reward network was defined as following: two regions within the striatum, namely the  
1007 NAc (BNA regions 223 and 224) and the ventro-medial putamen (BNA regions 225 and 226, left  
1008 and right respectively), and two frontal areas, namely the anterior cingulate (BNA regions 177,  
1009 179, 183 and 178, 180, 184, left and right respectively) and the orbitofrontal cortex within the  
1010 vmPFC (BNA regions 41, 45, 47, 49, 187 and 42, 46, 48, 50, 188 for left and right respectively).  
1011 The motor network included the following areas: the dorso-lateral putamen (BNA 229, 230, for left  
1012 and right respectively), the dorsal caudate (BNA regions 227, 228 for left and right respectively)  
1013 the medial part of the SMA (BNA regions 9 and 10, left and right respectively) and the part of the  
1014 M1 associated to upper limb function (BNA regions 57 and 58, left and right respectively). Notably,  
1015 we considered connectivity in the left and right motor and reward networks regardless of laterality.  
1016 These ROIs were selected based on the following rationale. First, they are consistent with previous  
1017 literature on reinforcement learning of motor skills<sup>68,90,133,134</sup>. Second, there is structural and  
1018 functional evidence for these fronto-striatal connections<sup>135,136</sup>. Third, the frontal areas included in  
1019 the analyses are well-established hubs of the motor learning (M1 and SMA, see <sup>12</sup> for a meta-  
1020 analysis) and reward networks (vmPFC and ACC, see <sup>11</sup> for a meta-analysis). Finally, gPPI was  
1021 also extracted within a control language network, defined based on the functional atlas described  
1022 by Shirer et al.(2012)<sup>70</sup>.

1023 **Supplementary material**

1024

1025 **1. Exclusion criteria**

1026

1027

1028

1029

1030

1031

1032

1033

1034

1035

1036

1037

1038

1039

1040

1041

1042

1043

1044

1045

1046

- Unable to consent
- Severe neuropsychiatric (e.g., major depression, severe dementia) or unstable systemic diseases (e.g., severe progressive and unstable cancer, life threatening infectious diseases)
- Severe sensory or cognitive impairment or musculoskeletal dysfunctions prohibiting to understand instructions or to perform the experimental tasks
- Color blindness
- Inability to follow or non-compliance with the procedures of the study
- Contraindications for NIBS or MRI:
  - Electronic or ferromagnetic medical implants/device, non-MRI compatible metal implant
  - History of seizures
  - Medication that significantly interacts with NIBS being benzodiazepines, tricyclic antidepressant and antipsychotics
- Regular use of narcotic drugs
- Left-handedness
- Pregnancy
- Request of not being informed in case of incidental findings
- Concomitant participation in another trial involving probing of neuronal plasticity.

1047

## 2. ContES Checklist

1048

| <b>Technological factors</b>                     |                                                                                                                                                                                                                                                                                    |
|--------------------------------------------------|------------------------------------------------------------------------------------------------------------------------------------------------------------------------------------------------------------------------------------------------------------------------------------|
| Manufacturer of Stimulator                       | DS5 Isolated Bipolar Constant Current Stimulator (Digitimer)                                                                                                                                                                                                                       |
| MR Conditional Electrode Details                 | Round, 3 cm <sup>2</sup> conductive rubber electrodes                                                                                                                                                                                                                              |
| Electrode Positioning                            | <p>F3 → F4<br/>TP7 → TP8</p> <p>A bandage is warped around the head to apply pressure and keep the electrodes in place</p> <p>Electrodes are oriented in order to have vertical cables entering parallel to the MRI coil</p> <p>Head was fixed with pillows to avoid movements</p> |
| MR Conditional Skin-Electrode Interface          | <p>10-20 gel</p> <p>One or two drops of saline were added when impedances were too high</p>                                                                                                                                                                                        |
| Amount of Contact Medium (Paste/Gel/Electrolyte) | Around 1mm of paste was manually placed on the electrodes                                                                                                                                                                                                                          |
| Electrode Placement Visualization                | <p>Pictures</p> 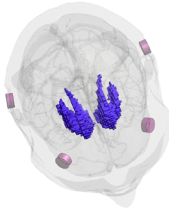                                                                                                                                                                               |

|                                                |                                                                                                                                                                                                                                                                                                                                                                                                                                                                                                                                                                                                                      |
|------------------------------------------------|----------------------------------------------------------------------------------------------------------------------------------------------------------------------------------------------------------------------------------------------------------------------------------------------------------------------------------------------------------------------------------------------------------------------------------------------------------------------------------------------------------------------------------------------------------------------------------------------------------------------|
| RF Filter                                      | NeuroConn DC-STIMULATOR MR RF filter module with MRI-compatible cables and electrodes                                                                                                                                                                                                                                                                                                                                                                                                                                                                                                                                |
| Wire Routing Pattern                           | <p>10 m ethernet cables between inner and outer box pass through a conduit along the wall of the MRI room until reaching the back of the MRI. Cables are then fixed with straps on the ground and on the wall of the MRI machine in order to avoid loops until reaching the interior of the coil.</p> <p>Cables between the head and the inner boxes were also fixed with straps and they were oriented in order to exit the magnetic field direction as soon as possible as indicated by the red arrows of the image below.</p> 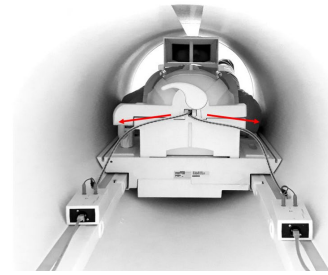 |
| tES-fMRI Machine Synchronization/Communication | <p>Stimulation was triggered by the stimulus delivery PC via parallel port to BNC cable. The parallel port of the stimulus delivery PC was connected to the DAQ controlling the stimulators.</p> <p>Stimulus delivery PC, in turn, was also receiving the scanner trigger from the scanner via USB port.</p>                                                                                                                                                                                                                                                                                                         |
| <b>Safety and noise tests</b>                  |                                                                                                                                                                                                                                                                                                                                                                                                                                                                                                                                                                                                                      |
| MR Conditionality Specifics for tES Setting    | Please refer to Section “Methods-Imaging acquisition”                                                                                                                                                                                                                                                                                                                                                                                                                                                                                                                                                                |
| tES-fMRI Setting Test - Safety Testing         | Impedances were checked before and after                                                                                                                                                                                                                                                                                                                                                                                                                                                                                                                                                                             |



|                                                          |                                                                                                                                                                                                                                                                                                                                                                                                                                                                                                                                                     |
|----------------------------------------------------------|-----------------------------------------------------------------------------------------------------------------------------------------------------------------------------------------------------------------------------------------------------------------------------------------------------------------------------------------------------------------------------------------------------------------------------------------------------------------------------------------------------------------------------------------------------|
|                                                          | <p>the stimulation.</p> <p>No temperature tests were performed during the experiment.</p> <p>Intensity titration was performed prior to entering the MRI, testing increasing currents (0.5, 1, 1.5 and 2 mA) and asking the subject to report any type of sensation.</p> <p>A sensation questionnaire was also performed at the end of the experiment.</p>                                                                                                                                                                                          |
| tES-fMRI Setting Test - Subjective Intolerance Reporting | No intolerances were reported by any subject                                                                                                                                                                                                                                                                                                                                                                                                                                                                                                        |
| tES-fMRI Setting Test - Noise/Artifact                   | Signal to Noise Ratio (SNR) analysis was performed on the fMRI images, please refer to Section “Methods-Signal to Noise Ratio”                                                                                                                                                                                                                                                                                                                                                                                                                      |
| Impedance Testing                                        | <p>Impedances were checked right after electrodes positioning outside the scanner, before and after the stimulation inside.</p> <p>One or two drops of saline solution were added if impedances were higher than 20k<math>\Omega</math></p>                                                                                                                                                                                                                                                                                                         |
| <b>Methodological factors</b>                            |                                                                                                                                                                                                                                                                                                                                                                                                                                                                                                                                                     |
| Concurrent tES-fMRI Timing                               | <p>For timings, please refer to the “Methods-Stimulation protocols” section</p> <p>To mitigate the impact of potential carry-over effects on our experimental results we used the following strategy:</p> <ol style="list-style-type: none"> <li>1) We stimulated for short periods in each condition (5 minutes interspersed with resting periods without stimulation; see “Methods-Stimulation protocols”);</li> <li>2) We imposed breaks (~7-8 minutes) between each stimulation protocol;</li> <li>3) We randomised the order of the</li> </ol> |

|                        |                                                                                           |
|------------------------|-------------------------------------------------------------------------------------------|
|                        | Stimulation conditions                                                                    |
| Imaging Session Timing | All sequences were performed with T1 stimulation electrodes placed on the subjects' head. |
| tES Experience Report  | Please refer to "Results" section and to Figure S5.                                       |

1049 **Table S1. ContES checklist as recommended in Ekhtiari et al., 2022<sup>120</sup> for concurrent tES-fMRI**  
1050 **studies.**

1051

1052 **3. Patterns of motion of the target used in the study**

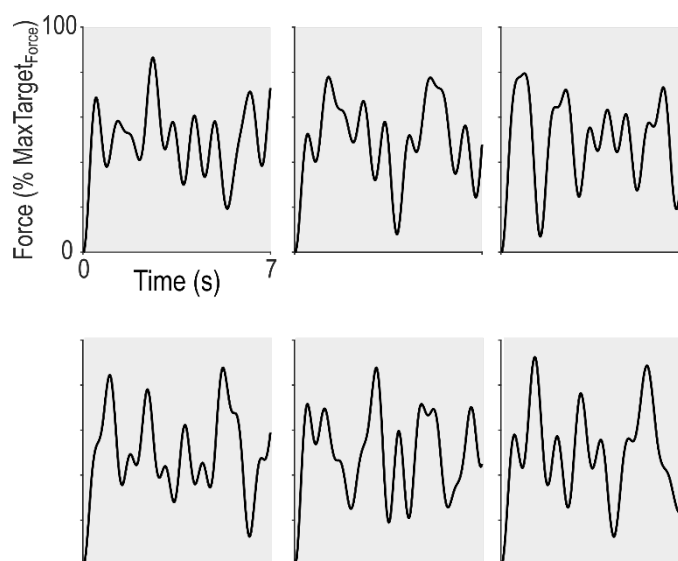

1053

1054 **Figure S1. Patterns of motion of the target.** For each block of training, participants had  
1055 to learn a new pattern of motion of the target. The patterns had similar mathematical properties  
1056 and their relationship to a condition was randomised (see Methods for more details).

1057

1058 **4. Additional behavioural experiment**

1059

1060 To determine the optimal experimental parameters to study reinforcement learning of  
1061 motor skills, we performed an additional behavioural experiment, in the absence of brain  
1062 stimulation and imaging. In particular, we tested the relationship between the amount of visual  
1063 feedback available during Training and the benefits of reinforcement in the force-tracking task.  
1064 Another group of young healthy participants (n=24; 14 women, 24.2 ± 0.5 years old, independent

1065 from the subjects tested in the main experiment) performed blocks of the task with Reinf<sub>ON</sub> or  
1066 Reinf<sub>OFF</sub> and with either full visual feedback or only partial visual feedback (cursor displayed for  
1067 35.7% of the total trial duration, as in the main study). Each learning block was composed of 30  
1068 trials (vs. 36 trials in the main study) and in addition to real-time closed-loop reinforcement  
1069 feedback, participants also received endpoint feedback on their overall performance after each  
1070 trial during Training (i.e., indicating success or failure on the trial). The LMM ran on the Post-  
1071 training data revealed a significant effect of visual feedback ( $F_{(1,788.33)}=5.90$ ;  $p=0.015$ ),  
1072 reinforcement ( $F_{(1,787.87)}=11.64$ ;  $p<0.001$ ) and a significant interaction between these two factors  
1073 ( $F_{(1,788.03)}=10.27$ ;  $p=0.0014$ , **Figure S2A**). Interestingly, Tukey-corrected post-hoc tests showed  
1074 that the interaction was due to the fact that while reinforcement did not improve learning when  
1075 Training was performed with full visual feedback ( $p=0.88$ ,  $d=0.014$ ), it induced robust benefits  
1076 when training with partial visual feedback ( $p<0.001$ ,  $d=0.46$ , **Figure S2B**). This result is in line with  
1077 previous literature showing that reinforcement feedback is particularly beneficial for motor learning  
1078 when visual feedback is uncertain<sup>57,62</sup>. Based on the outcome of this additional study, we decided  
1079 to train participants with partial visual feedback in the present experiment to evaluate the effect of  
1080 tTIS in a version of the task that yielded significant reinforcement gains. Notably, this work also  
1081 shows that the effect of reinforcement on motor learning observed in the tTIS<sub>Sham</sub> and tTIS<sub>20Hz</sub>  
1082 conditions (Figure 2) is reproducible.

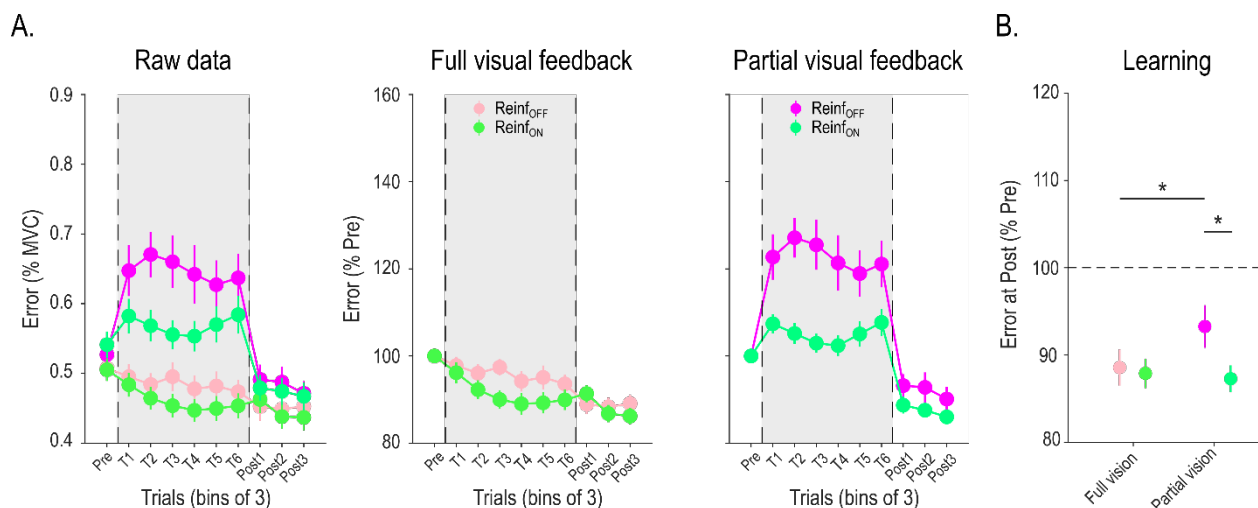

1083

1084

1085

1086

1087

1088

1089

1090

1091

1092

1093

1094

1095

1096

**Figure S2. Results of an additional behavioural experiment (n = 24). A) Motor performance across training.** Raw Error data (expressed in % of Maximum Voluntary Contraction [MVC]) are presented on the left panel for the different experimental conditions in bins of 3 trials. On the right, the two plots represent the Pre-training normalised Error in the Full visual feedback and Partial visual feedback blocks (i.e., cursor displayed 35.7% of the time, as in the main experiment). Note the strong gains in motor performance, especially with partial visual feedback but also the limited improvement of performance during training in this condition. **B) Motor learning.** Averaged Error at Post-training (normalised to Pre-training) in the different experimental conditions are shown, for the subjects included in the analysis (i.e., after outlier detection, n=23). Reduction of Error at Post-training reflects true improvement at tracking the target in Test conditions (in the absence of reinforcement or visual uncertainty). The LMM ran on these data revealed significant a significant effect of reinforcement feedback on learning when training with partial, but not full, visual feedback. \*: p<0.05. Data are represented as mean ± SE.

1097

1098

1099

## 5. Evolution of motor performance in the different conditions

1100

1101

1102

1103

1104

1105

1106

1107

1108

The main analysis revealed a general effect of tTIS on motor performance during Training, irrespective of the presence of reinforcement. As a subsequent analysis, we also asked whether the evolution of performance during Training depended on type of striatal stimulation applied. We ran the same LMM as in the main study (see Results) but with the addition of a continuous fixed effect Trial, allowing us to evaluate whether the slope of performance change was different according to tTIS<sub>TYPE</sub>. (**Figure S3**). Indeed, this analysis revealed a significant tTIS<sub>TYPE</sub> × Trial interaction ( $F_{(2, 3399)}=4.46$ ;  $p=0.012$ ) that was due to different slopes in the tTIS<sub>Sham</sub> compared to the tTIS<sub>20Hz</sub> ( $p=0.013$ ) and tTIS<sub>80Hz</sub> (at the trend level,  $p=0.068$ ) conditions. Evolution of performance in the tTIS<sub>20Hz</sub> and tTIS<sub>80Hz</sub> conditions was not different ( $p=0.81$ ). Notably, this effect

1109 could not be explained by differences in initial performance (all  $p > 0.21$  when comparing  
1110 intercepts). Moreover, the effect of tTIS on motor improvement during Training did also not depend  
1111 on the presence of reinforcement ( $\text{Reinf}_{\text{TYPE}}$ ,  $\text{tTIS}_{\text{TYPE}}$  and Trial:  $F_{(2, 3399)} = 0.51$ ;  $p = 0.60$ ). Overall,  
1112 this analysis shows that the detrimental effect of striatal tTIS on motor performance is due to an  
1113 impaired ability to improve performance with practice and further confirms that tTIS did not  
1114 modulate the ability to use reinforcement feedback during Training.

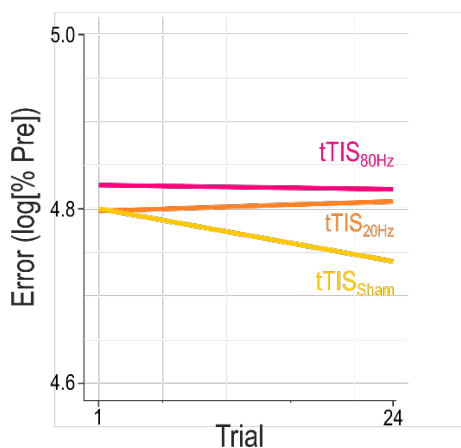

1115  
1116 **Figure S3. Slopes of performance change during Training in the different stimulation**  
1117 **conditions.** Modeled performance change for tTIS<sub>Shram</sub>, tTIS<sub>20Hz</sub> and tTIS<sub>80Hz</sub> throughout Training.  
1118 The tTIS<sub>TYPE</sub> X Trial interaction revealed that performance improved more with tTIS<sub>Shram</sub> compared  
1119 to tTIS<sub>20Hz</sub> and tTIS<sub>80Hz</sub>. Notably this effect was not modulated by the presence of reinforcement  
1120 and could not be explained by differences in intercepts.

1121

1122

## 1123 **6. Effect of visual and reinforcement feedback on motor performance**

1124

1125 As a control, we asked whether the tTIS and reinforcement effects reported in Figure 2  
1126 depended on the availability of visual information during Training. To do so, we computed the  
1127 normalised Error for phases with the Cursor<sub>ON</sub> or Cursor<sub>OFF</sub> (taking into account a lag of 0.25s,  
1128 corresponding to the estimated visuo-motor delay in this type of task for young healthy subjects<sup>137</sup>)  
1129 and analysed these data in a LMM including the factors  $\text{Reinf}_{\text{TYPE}}$ ,  $\text{tTIS}_{\text{TYPE}}$  and  $\text{Cursor}_{\text{TYPE}}$ . As in  
1130 the main analysis, we confirmed the effect of  $\text{Reinf}_{\text{TYPE}}$  ( $F_{(1, 6872)} = 344.87$ ;  $p < 0.001$ ),  $\text{tTIS}_{\text{TYPE}}$   
1131 ( $F_{(2, 6872)} = 28.79$ ;  $p < 0.001$ ) and the absence of interaction between these two factors ( $F_{(2, 6875.4)} = 0.49$ ;

1132  $p=0.61$ , Figure S4). This analysis also revealed a  $\text{Cursor}_{\text{TYPE}}$  effect ( $F_{(2,6875.3)}=49.66$ ;  $p<0.001$ )  
1133 which was due to the fact that the Error was generally higher in the absence visual information on  
1134 the position of the cursor ( $d=0.17$ ). Interestingly, there was also a  $\text{Reinf}_{\text{TYPE}} \times \text{Cursor}_{\text{TYPE}}$  interaction  
1135 ( $F_{(2,6872)}=29.35$ ;  $p<0.001$ ): while benefits of reinforcement were significant in both the  $\text{Cursor}_{\text{ON}}$   
1136 ( $p<0.001$ ,  $d=0.32$ ) and  $\text{Cursor}_{\text{OFF}}$  ( $p<0.001$ ,  $d=0.58$ ) conditions, the magnitude of the  
1137 reinforcement-related gains in performance were larger in the  $\text{Cursor}_{\text{OFF}}$  condition (t-test  
1138 comparing the gains:  $t_{(46)}=2.74$ ,  $p=0.0086$ ). Moreover, post-hoc tests also revealed that the  
1139 absence of vision of the cursor was detrimental for performance in the  $\text{Reinf}_{\text{OFF}}$  condition ( $p<0.001$ ,  
1140  $d=0.30$ ) but not in presence of  $\text{Reinf}_{\text{ON}}$  ( $p=0.25$ ,  $d=0.039$ ). Hence, the presence of reinforcement  
1141 was particularly beneficial when visual information was not available, in line with previous  
1142 research<sup>57,62</sup> and also in agreement with the results of our additional experiment (Figure S2).  
1143 Importantly, the LMM did not reveal any interaction between  $t\text{TIS}_{\text{TYPE}}$  and  $\text{Cursor}_{\text{TYPE}}$  ( $F_{(2,6872)}=0.49$ ;  
1144  $p=0.31$ ) and no triple interaction ( $F_{(2,6872)}=1.53$ ;  $p=0.22$ ), confirming that striatal  $t\text{TIS}$  had a global  
1145 effect on motor performance during Training, which did not depend on the presence of visual and  
1146 reinforcement feedback.

1147

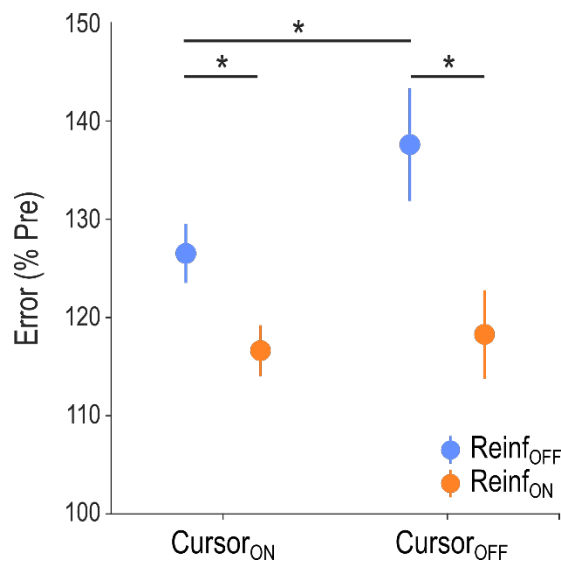

1148

1149 **Figure S4. Effect of visual and reinforcement feedback on motor performance.** Pre-  
1150 training normalised Error depending on the presence of the cursor ( $\text{Cursor}_{\text{ON}}$  or  $\text{Cursor}_{\text{OFF}}$ ), and

1151 the presence of reinforcement feedback during Training. The significant Reinf<sub>TYPE</sub> x Cursor<sub>TYPE</sub>  
1152 interaction was related to the fact that the benefits of reinforcement were stronger when visual  
1153 information was not available. Notably, this analysis takes into account a visuo-motor delay of  
1154 0.25s, as previously reported during a similar task (Lam and Zenon, 2021). \*: p<0.05. Data are  
1155 represented as mean ± SE.

1156

1157

## 1158 **7. Control analyses of behavioural data**

1159

### 1160 Pre-training performance

1161 In order to verify that our main behavioural results were not influenced by potential  
1162 differences in initial performance between conditions despite randomisation, we analysed the  
1163 Error at Pre-training between conditions. We did not find any tTIS<sub>TYPE</sub> ( $F_{(2,519.15)}=1.64$ ;  $p=0.20$ ) or  
1164 tTIS<sub>TYPE</sub> x Reinf<sub>TYPE</sub> effect ( $F_{(2,519.99)}=1.08$ ;  $p=0.34$ ), suggesting that the main behavioural results  
1165 could not be accounted for by differences in initial performance between conditions. However, the  
1166 LMM did reveal a Reinf<sub>TYPE</sub> effect ( $F_{(1,519.15)}=12.47$ ;  $p<0.001$ ), that was due to the fact that Pre-  
1167 training performance was generally better in Reinf<sub>OFF</sub> blocks. This effect, which was opposite to  
1168 our learning results (generally better learning with Reinf<sub>ON</sub>), may be related to an expectancy effect  
1169 stemming from the repetitive structure of the reinforcement conditions (see Methods). However,  
1170 the absence of interaction with tTIS<sub>TYPE</sub> is strongly suggestive that this effect did not drive any of  
1171 the main findings. Put together, these data provide confidence that the differential effects of striatal  
1172 tTIS on motor learning depending on the presence of reinforcement were not the result of different  
1173 initial performance between conditions.

### 1174 Success rate

1175 Overall, the amount of positive reinforcement (i.e., when the target was green) averaged  
1176 52.78 +/- 0.42% and was comparable across tTIS<sub>TYPES</sub> ( $F_{(2,1702)}=0.17$ ;  $p=0.84$ ), suggesting that the  
1177 closed-loop reinforcement schedule was successful at providing similar reinforcement feedback

1178 despite differences in performance between conditions. Hence, different success rates during  
1179 training cannot explain the effect of the different striatal tTIS conditions on motor learning.

#### 1180 Frequency of flashing

1181 Analysis of the frequency of flashing in the different conditions did not reveal any effect of  
1182 tTIS<sub>TYPE</sub> ( $F_{(2,3283)}=0.85$ ;  $p=0.43$ ) nor any Reinf<sub>TYPE</sub> x tTIS<sub>TYPE</sub> interaction ( $F_{(2,3283)}=0.19$ ;  $p=0.82$ ),  
1183 suggesting that the behavioural effects of tTIS could not be explained by a visual confound.  
1184 However, this analysis did reveal a Reinf<sub>TYPE</sub> effect ( $F_{(1,3283)}=33.62$ ;  $p<0.001$ ) which was due to the  
1185 fact that the average frequency in the Reinf<sub>OFF</sub> condition ( $4.28 \pm 0.097$  Hz) was slightly but  
1186 significantly higher than with Reinf<sub>ON</sub> ( $4.08 \pm 0.098$  Hz;  $F_{(1,3283)}=33.62$ ;  $p<0.001$ ). Notably, in  
1187 absolute terms, this difference represented only a difference of 1.4 change of color over the whole  
1188 7 s trial, which we think is unlikely to explain the improvement of performance in the Reinf<sub>ON</sub>  
1189 condition.

#### 1190 Order of the reinforcement conditions

1191 Previous exposure to reinforcement feedback may improve subsequent learning through  
1192 reinforcement<sup>138</sup>. Thanks to our randomisation procedure, the previous exposure to the Reinf<sub>ON</sub>  
1193 condition was equally counterbalanced in all stimulation conditions, and should therefore not  
1194 influence our main results. Still, we performed an analysis to specifically investigate the effect of  
1195 the previous exposure to Reinf<sub>ON</sub>. To do so, we split the participants depending on whether they  
1196 experienced Reinf<sub>ON</sub> or Reinf<sub>OFF</sub> first (12 subjects per group) and performed a new LMM on the  
1197 Post-training data with the addition of a categorical factor Group<sub>TYPE</sub>. In particular, if the previous  
1198 exposure to the Reinf<sub>ON</sub> condition influenced following learning with reinforcement, we would  
1199 expect to see a Group<sub>TYPE</sub> x Reinf<sub>TYPE</sub> interaction. The analysis did not indicate any Group<sub>TYPE</sub>  
1200 effect on learning ( $F_{(1,21.96)}=0.35$ ;  $p=0.56$ ), neither did it reveal a Group<sub>TYPE</sub> x Reinf<sub>TYPE</sub> ( $F_{(1,4)}=0.72$ ;  
1201  $p=0.44$ ), or a triple interaction with tTIS<sub>TYPE</sub> ( $F_{(2,1105.06)}=1.75$ ;  $p=0.17$ ). Overall, this analysis



1202 suggests that the order of the exposure to the reinforcement condition did not influence the present  
 1203 findings.

1204

1205 **8. Blinding integrity and tTIS-evoked sensations**

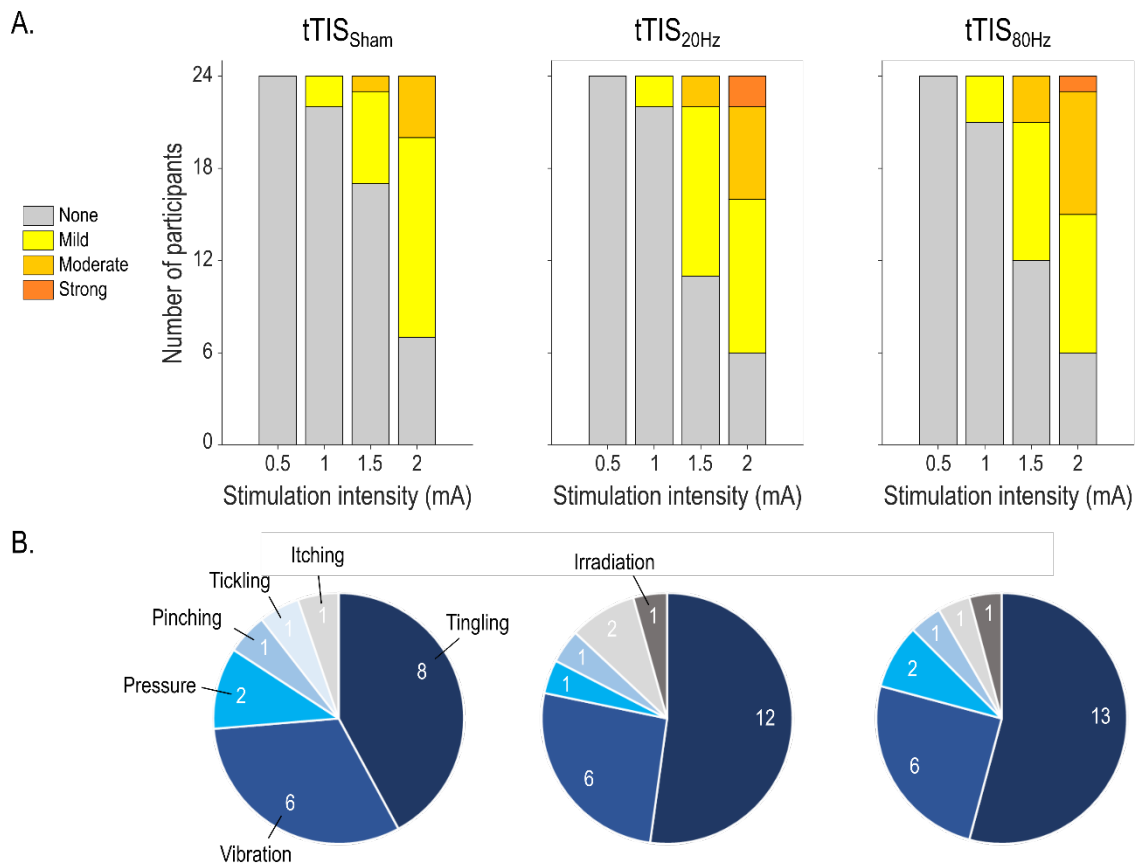

1206

1207 **Figure S5. tTIS-related sensations. A) Magnitude of tTIS-related sensations.**  
 1208 Magnitude of sensations reported before the experiment for current amplitudes ranging from 0.5  
 1209 to 2 mA for each tTIS<sub>TYPE</sub>. The current amplitude used in the present experiment was 2 mA. **B)**  
 1210 **Types of tTIS-related sensations.** Type of sensations as described by the participants, at 2 mA.  
 1211 Note that subjects were allowed to describe their sensations with up to two different words.  
 1212

1213

## 9. Brain activity during reinforcement motor learning

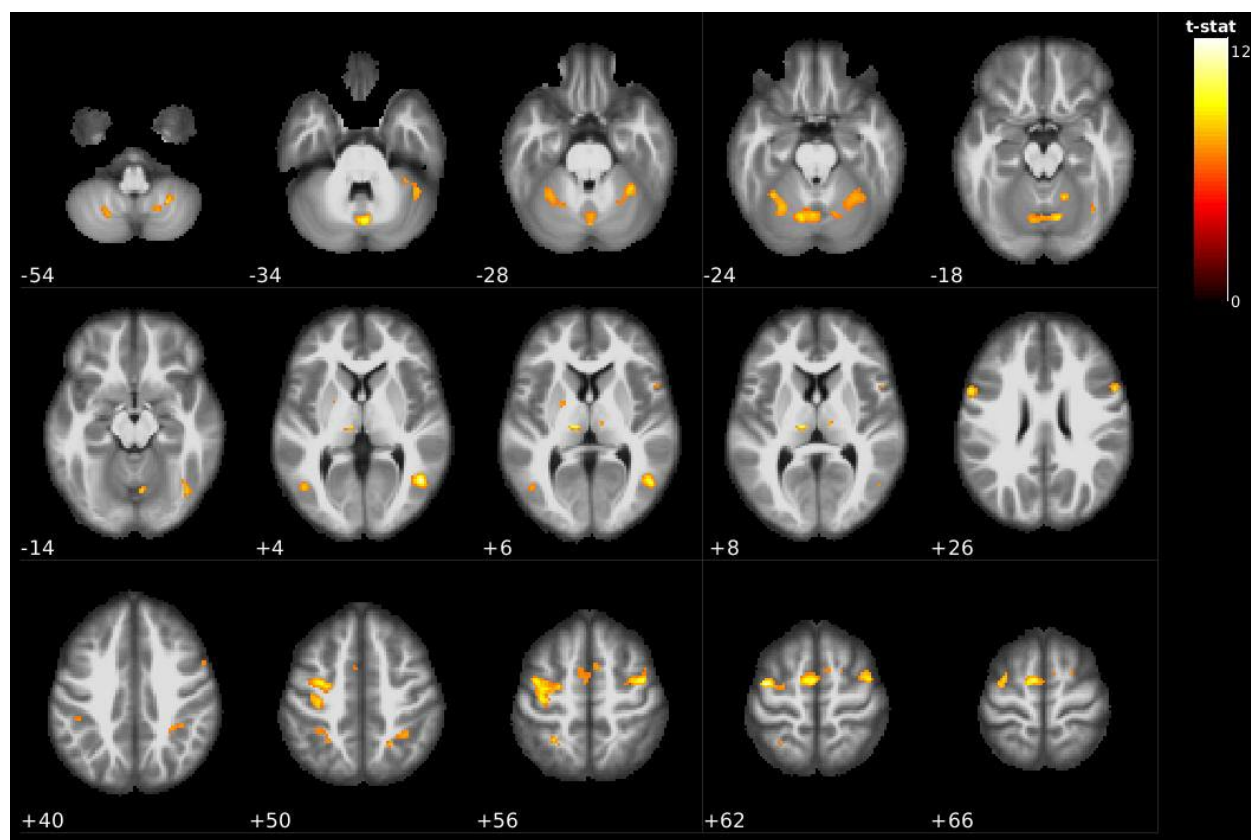

1214

1215 **Figure S6. Whole-brain activity during reinforcement motor learning.** Activation maps  
1216 for the contrast task>rest in the tTIS<sub>Sham</sub>, Reinf<sub>ON</sub> condition showing activation of key areas of the  
1217 reinforcement motor learning network including the putamen, thalamus, cerebellum and  
1218 sensorimotor network, especially on the left side. Significant clusters are shown for corrected  
1219 voxel-wise family wise error (FWE),  $p=0.05$ , and corrected cluster-based false discovery rate  
1220 (FDR),  $p=0.05$ .

1221

1222

| Cluster-level |           |     |                     | Peak-level |           |       |                   |                     | x   | y   | z   | Region                |
|---------------|-----------|-----|---------------------|------------|-----------|-------|-------------------|---------------------|-----|-----|-----|-----------------------|
| pFWE-corr     | qFDR-corr | kE  | P <sub>uncorr</sub> | pFWE-corr  | qFDR-corr | T     | (Z <sub>E</sub> ) | P <sub>uncorr</sub> |     |     |     |                       |
| <0.001        | <0.001    | 135 | <0.001              | <0.001     | 0.005     | 12.63 | 6.84              | <0.001              | 46  | -62 | 4   | Temporal_Mid_R        |
| <0.001        | <0.001    | 523 | <0.001              | <0.001     | 0.005     | 12.32 | 6.77              | <0.001              | -40 | -8  | 62  | Precentral_L          |
|               |           |     |                     | <0.001     | 0.021     | 10.62 | 6.33              | <0.001              | -34 | -6  | 52  | Postcentral_L         |
|               |           |     |                     | <0.001     | 0.021     | 10.43 | 6.28              | <0.001              | -36 | -20 | 54  | Precentral_L          |
| <0.001        | <0.001    | 335 | <0.001              | <0.001     | 0.018     | 11.08 | 6.46              | <0.001              | -8  | -6  | 64  | Supp_Motor_Area_L     |
|               |           |     |                     | 0.003      | 0.145     | 8.21  | 5.56              | <0.001              | 6   | 6   | 58  | Supp_Motor_Area_R     |
|               |           |     |                     | 0.003      | 0.145     | 8.20  | 5.55              | <0.001              | -4  | -2  | 54  | Supp_Motor_Area_L     |
| <0.001        | <0.001    | 44  | <0.001              | <0.001     | 0.021     | 10.65 | 6.34              | <0.001              | -10 | -20 | 6   | Thal_IL_L             |
| <0.001        | <0.001    | 162 | <0.001              | <0.001     | 0.021     | 10.36 | 6.26              | <0.001              | 42  | -6  | 56  | Frontal_Mid_2_R       |
|               |           |     |                     | <0.001     | 0.042     | 9.48  | 5.99              | <0.001              | 34  | -4  | 58  | Frontal_Sup_2_R       |
| <0.001        | <0.001    | 175 | <0.001              | <0.001     | 0.021     | 10.27 | 6.23              | <0.001              | -58 | 10  | 28  | Precentral_L          |
|               |           |     |                     | <0.001     | 0.037     | 9.60  | 6.03              | <0.001              | -56 | 8   | 20  | Frontal_Inf_Oper_L    |
|               |           |     |                     | 0.019      | 0.490     | 7.32  | 5.21              | <0.001              | -48 | 2   | 16  | Rolandic_Oper_L       |
| <0.001        | <0.001    | 601 | <0.001              | <0.001     | 0.024     | 10.06 | 6.17              | <0.001              | 2   | -74 | -34 | Vermis_7              |
|               |           |     |                     | <0.001     | 0.025     | 9.99  | 6.15              | <0.001              | -12 | -70 | -22 | Cerebellum_6_L        |
|               |           |     |                     | <0.001     | 0.027     | 9.88  | 6.12              | <0.001              | 12  | -70 | -20 | Cerebellum_6_R        |
| <0.001        | <0.001    | 82  | <0.001              | <0.001     | 0.070     | 9.14  | 5.88              | <0.001              | 56  | 10  | 26  | Frontal_Inf_Oper_R    |
|               |           |     |                     | 0.006      | 0.234     | 7.86  | 5.42              | <0.001              | 56  | 10  | 38  | Precentral_R          |
| <0.001        | <0.001    | 141 | <0.001              | 0.001      | 0.092     | 8.89  | 5.80              | <0.001              | -34 | -52 | -24 | Cerebellum_6_L        |
|               |           |     |                     | 0.002      | 0.117     | 8.47  | 5.65              | <0.001              | -28 | -62 | -24 | Cerebellum_6_L        |
| <0.001        | <0.001    | 76  | <0.001              | 0.001      | 0.092     | 8.87  | 5.79              | <0.001              | -28 | -52 | 56  | Parietal_Sup_L        |
|               |           |     |                     | 0.011      | 0.341     | 7.57  | 5.31              | <0.001              | -30 | -44 | 48  | Parietal_Inf_L        |
| <0.001        | <0.001    | 200 | <0.001              | 0.001      | 0.092     | 8.77  | 5.76              | <0.001              | 32  | -48 | -28 | Cerebellum_6_R        |
|               |           |     |                     | 0.013      | 0.382     | 7.49  | 5.28              | <0.001              | 34  | -40 | -34 | Cerebellum_6_R        |
| <0.001        | <0.001    | 36  | <0.001              | 0.001      | 0.092     | 8.73  | 5.74              | <0.001              | 16  | -54 | -18 | Cerebellum_4_5_R      |
| <0.001        | <0.001    | 28  | <0.001              | 0.001      | 0.101     | 8.63  | 5.71              | <0.001              | 26  | -58 | -54 | Cerebellum_8_R        |
| <0.001        | <0.001    | 62  | <0.001              | 0.001      | 0.113     | 8.51  | 5.67              | <0.001              | 38  | -62 | -16 | Fusiform_R            |
|               |           |     |                     | 0.002      | 0.117     | 8.45  | 5.64              | <0.001              | 42  | -72 | -12 | Occipital_Inf_R       |
| <0.001        | <0.001    | 21  | <0.001              | 0.002      | 0.117     | 8.41  | 5.63              | <0.001              | -46 | -68 | 4   | Occipital_Mid_L       |
| <0.001        | <0.001    | 141 | <0.001              | 0.002      | 0.130     | 8.33  | 5.60              | <0.001              | 22  | -56 | 50  | Location not in atlas |
|               |           |     |                     | 0.002      | 0.130     | 8.30  | 5.59              | <0.001              | 30  | -48 | 48  | Parietal_Sup_R        |
|               |           |     |                     | 0.007      | 0.266     | 7.76  | 5.39              | <0.001              | 36  | -40 | 42  | SupraMarginal_R       |
| <0.001        | <0.001    | 29  | <0.001              | 0.004      | 0.170     | 8.09  | 5.51              | <0.001              | 44  | -50 | -34 | Cerebellum_Crus_1_R   |

|        |        |    |        |       |       |      |      |        |     |     |     |                    |
|--------|--------|----|--------|-------|-------|------|------|--------|-----|-----|-----|--------------------|
| <0.001 | <0.001 | 59 | <0.001 | 0.004 | 0.178 | 8.04 | 5.49 | <0.001 | -22 | -66 | -52 | Cerebellum 8 L     |
| <0.001 | 0.006  | 12 | 0.003  | 0.004 | 0.190 | 7.99 | 5.47 | <0.001 | 10  | -16 | 8   | Thal MDI R         |
| 0.001  | 0.043  | 6  | 0.028  | 0.009 | 0.319 | 7.63 | 5.33 | <0.001 | -22 | -2  | 6   | Putamen L          |
| <0.001 | <0.001 | 34 | <0.001 | 0.009 | 0.319 | 7.63 | 5.33 | <0.001 | 18  | -64 | -54 | Cerebellum 8 R     |
| 0.001  | 0.300  | 7  | 0.019  | 0.023 | 0.545 | 7.23 | 5.17 | <0.001 | 20  | 2   | 62  | Frontal_Sup_2_R    |
| 0.001  | 0.030  | 7  | 0.019  | 0.024 | 0.560 | 7.21 | 5.16 | <0.001 | 52  | 12  | 8   | Frontal_Inf_Oper_R |
| 0.001  | 0.030  | 7  | 0.019  | 0.025 | 0.568 | 7.19 | 5.16 | <0.001 | -44 | -36 | 40  | Parietal_Inf_L     |

1223 **Table S2: Significant clusters and the respective local maxima in the tTIS<sub>Sham</sub>,**  
 1224 **Reinf<sub>ON</sub> condition.** Related to Figure S6. Regions were identified with the Automated Anatomical  
 1225 Labelling atlas 3 (AAL3<sup>139</sup>). Significant clusters were selected for corrected voxel-wise family wise  
 1226 error (FWE), p=0.05, and corrected cluster-based false discovery rate (FDR), p=0.05.

1227  
 1228

1229 **10. Correlation between effect of tTIS<sub>80Hz</sub> on reinforcement motor learning and**  
 1230 **modulation of whole-brain activity**

1231

| Cluster-level |              |            |                     | Peak-level   |              |             |                   |                     | x          | y         | z        | Region                |
|---------------|--------------|------------|---------------------|--------------|--------------|-------------|-------------------|---------------------|------------|-----------|----------|-----------------------|
| pFWE-corr     | qFDR-corr    | kE         | P <sub>uncorr</sub> | pFWE-corr    | qFDR-corr    | T           | (Z <sub>E</sub> ) | P <sub>uncorr</sub> |            |           |          |                       |
| <b>0.003</b>  | <b>0.005</b> | <b>157</b> | <b>&lt;0.001</b>    | <b>0.027</b> | <b>0.065</b> | <b>7.29</b> | <b>5.14</b>       | <b>&lt;0.001</b>    | <b>10</b>  | <b>18</b> | <b>0</b> | Caudate R             |
|               |              |            |                     | 0.639        | 0.678        | 5.38        | 4.25              | <0.001              | 0          | 0         | 10       | Location not in atlas |
|               |              |            |                     | 0.921        | 0.757        | 4.89        | 3.98              | <0.001              | 6          | 6         | 2        | Location not in atlas |
| <b>0.007</b>  | <b>0.005</b> | <b>138</b> | <b>&lt;0.001</b>    | <b>0.693</b> | <b>0.678</b> | <b>5.30</b> | <b>4.21</b>       | <b>&lt;0.001</b>    | <b>-16</b> | <b>14</b> | <b>6</b> | Location not in atlas |
|               |              |            |                     | 0.923        | 0.757        | 4.88        | 3.98              | <0.001              | -22        | 14        | -2       | Putamen L             |
|               |              |            |                     | 1.000        | 0.810        | 4.26        | 3.60              | <0.001              | -18        | 8         | -6       | Putamen L             |

1232 **Table S3. Significant clusters for the correlation between the behavioural and neural**  
 1233 **effects of tTIS<sub>80Hz</sub> (vs. tTIS<sub>20Hz</sub>).** Related to Figure 3B. Two significant clusters were found with  
 1234 several local maxima. Notably, the left cluster also encompassed a portion of the left caudate  
 1235 (related to Figure 3). Regions were identified with the Automated Anatomical Labelling atlas 3  
 1236 (AAL3<sup>139</sup>). Significant clusters were selected for uncorrected voxel-wise family wise error (FWE),  
 1237 p=0.001, and corrected cluster-based false discovery rate (FDR), p=0.05.

1238  
 1239

1240 **11. Control analysis on striatum to frontal cortex effective connectivity**

1241

1242 The connectivity analysis showed that tTIS<sub>80Hz</sub>, but not tTIS<sub>20Hz</sub>, increased striatum to  
 1243 frontal effective connectivity and that this effect depended on the type of network considered

1244 (reward vs. motor) and on the presence of reinforcement (Figure 4). In this analysis we considered  
1245 effective connectivity between the motor striatum and M1 and SMA for the motor network and the  
1246 limbic striatum with ACC and vmPFC for the reward network, based on a large body of  
1247 literature<sup>11,12,135,136</sup> (see Methods for a detailed justification of the ROIs). To verify whether our  
1248 results depended on the specific frontal ROIs included in the analysis, we performed a new  
1249 analysis. More specifically, we decomposed connectivity in each network for each frontal cortical  
1250 area (M1 and SMA in the motor network and ACC and vmPFC in the reward network) and ran two  
1251 separate LMMs on each network with  $tTIS_{TYPE}$ ,  $Reinf_{TYPE}$  as well as  $ROI_{TYPE}$  (M1 or SMA for the  
1252 LMM run on the motor network and ACC or vmPFC for the reward network) as fixed effects.  
1253 Consistent with our initial findings, we found effects of  $tTIS_{TYPE}$  on both LMMs (motor network:  
1254  $F_{(2,1089.7)}=3.12$ ;  $p=0.044$  and reward network:  $F_{(2,1112)}=6.78$ ;  $p=0.0012$ ). Moreover, there was a  
1255 significant  $tTIS_{TYPE} \times Reinf_{TYPE}$  interaction in the motor network ( $F_{(2,1112)}=3.36$ ;  $p=0.035$ ), which was  
1256 at the trend level in the reward network ( $F_{(2,1113.8)}=2.37$ ;  $p=0.094$ ). Most importantly, these effects  
1257 were not modulated by  $ROI_{TYPE}$  in any network ( $tTIS_{TYPE} \times Reinf_{TYPE} \times ROI_{TYPE}$  in motor network:  
1258  $F_{(2,1112)}=0.83$ ;  $p=0.44$ , in reward network:  $F_{(2,1112)}=0.61$ ;  $p=0.54$ ). This analysis suggests that the  
1259 main connectivity findings were not influenced by the specific frontal ROIs considered in the  
1260 analysis.

1261

1262

## 1263 **12. Relationship between the neural and behavioural effects of $tTIS_{80Hz}$ and impulsivity**

1264

1265 Characterising individual factors that influence responsiveness to brain stimulation is an  
1266 important line of research both for fundamental neuroscience but also to determine profiles of  
1267 responders for future clinical translation. Based on previous literature linking striatal gamma  
1268 oscillatory mechanisms and impulsivity<sup>72</sup>, we explored the possibility that impulsivity influences  
1269 responsiveness to striatal  $tTIS_{80Hz}$  (**Figure S7**).

1270 First, we exploited the BOLD data and asked if inter-individual variability in the neural  
1271 effects of tTIS<sub>80Hz</sub> during reinforcement motor learning (i.e., in the Reinf<sub>ON</sub> condition) was related  
1272 to impulsivity at the whole-brain level. Impulsivity was evaluated by a well-established independent  
1273 delay-discounting questionnaire performed at the beginning of the experiment<sup>75,76</sup>. Strikingly, this  
1274 analysis revealed that impulsivity was associated to the effect of tTIS<sub>80Hz</sub> (with respect to tTIS<sub>20Hz</sub>)  
1275 specifically in the left caudate nucleus (Figure S7A, Table S4). No other clusters were found. As  
1276 such, the most impulsive participants exhibited an increase of left caudate activity with tTIS<sub>80Hz</sub>  
1277 (compared to tTIS<sub>20Hz</sub>) while the least impulsive ones rather presented a decrease of BOLD signal,  
1278 consistent with the idea that impulsivity modulates the neuronal responsiveness to tTIS ( $R^2=0.47$ ;  
1279  $p<0.001$ ; Figure S7B). No significant clusters of correlation were found for the tTIS<sub>80Hz</sub> – tTIS<sub>Sham</sub>  
1280 contrast, neither for the control tTIS<sub>20Hz</sub> - tTIS<sub>Sham</sub> contrast. Hence, this analysis suggests that the  
1281 effect of tTIS<sub>80Hz</sub> on caudate activity depends on participants' impulsivity.

1282 As a second step, we aimed at evaluating the association between impulsivity and the  
1283 increased striatum to motor cortex connectivity observed with tTIS<sub>80Hz</sub>, in the presence of  
1284 reinforcement. Notably, such pattern of increased connectivity in fronto-striatal circuits has been  
1285 described as a pathophysiological mechanism in multiple neuro-psychiatric disorders involving  
1286 impulsivity<sup>101–104</sup>. Hence, we first asked if striatum to motor cortex connectivity was related to  
1287 impulsivity during reinforcement motor learning in the absence of stimulation (i.e., in the tTIS<sub>Sham</sub>  
1288 condition). Indeed, we found a significant positive relationship between impulsivity and striatum to  
1289 motor cortex connectivity (robust linear regression:  $R^2=0.10$ ;  $p=0.0038$ ), in line with previous  
1290 results<sup>101–104</sup>. Then, we evaluated whether the increase of connectivity observed with tTIS<sub>80Hz</sub> in  
1291 the Reinf<sub>ON</sub> condition (Figure 4A) could be related to impulsivity. Indeed, we found that the effect  
1292 of tTIS<sub>80Hz</sub> on connectivity was negatively correlated to impulsivity both when contrasting tTIS<sub>80Hz</sub>  
1293 with tTIS<sub>Sham</sub> ( $R^2=0.19$ ;  $p=0.043$ , Figure S7C, left) and with tTIS<sub>20Hz</sub> ( $R^2=0.28$ ;  $p=0.021$ , Figure S7C,  
1294 middle): participants with the largest increase in connectivity with tTIS<sub>80Hz</sub> in the Reinf<sub>ON</sub> condition

1295 were also the least impulsive ones. Such correlation was absent when contrasting  $tTIS_{20Hz}$  and  
 1296  $tTIS_{Sham}$  ( $R^2=0.0031$ ;  $p=0.31$ , Figure S7C, right), but also when considering the same contrasts in  
 1297 the reward instead of the motor network ( $p=0.93$  and  $p=0.86$  for the  $tTIS_{80Hz}-tTIS_{Sham}$  and  $tTIS_{80Hz}-$   
 1298  $tTIS_{20Hz}$  contrasts, respectively). Hence, striatum to motor cortex effective connectivity during the  
 1299 task was positively correlated to impulsivity, but the change in connectivity induced by  $tTIS_{80Hz}$   
 1300 was rather negatively associated with impulsivity. This may be due to a ceiling effect in the most  
 1301 impulsive participants: exhibiting initially high levels of connectivity may leave less room for further  
 1302 modulation by  $tTIS_{80Hz}$ . These results suggest that inter-individual variability in impulsivity might  
 1303 influence neural responses to striatal  $tTIS_{80Hz}$ .

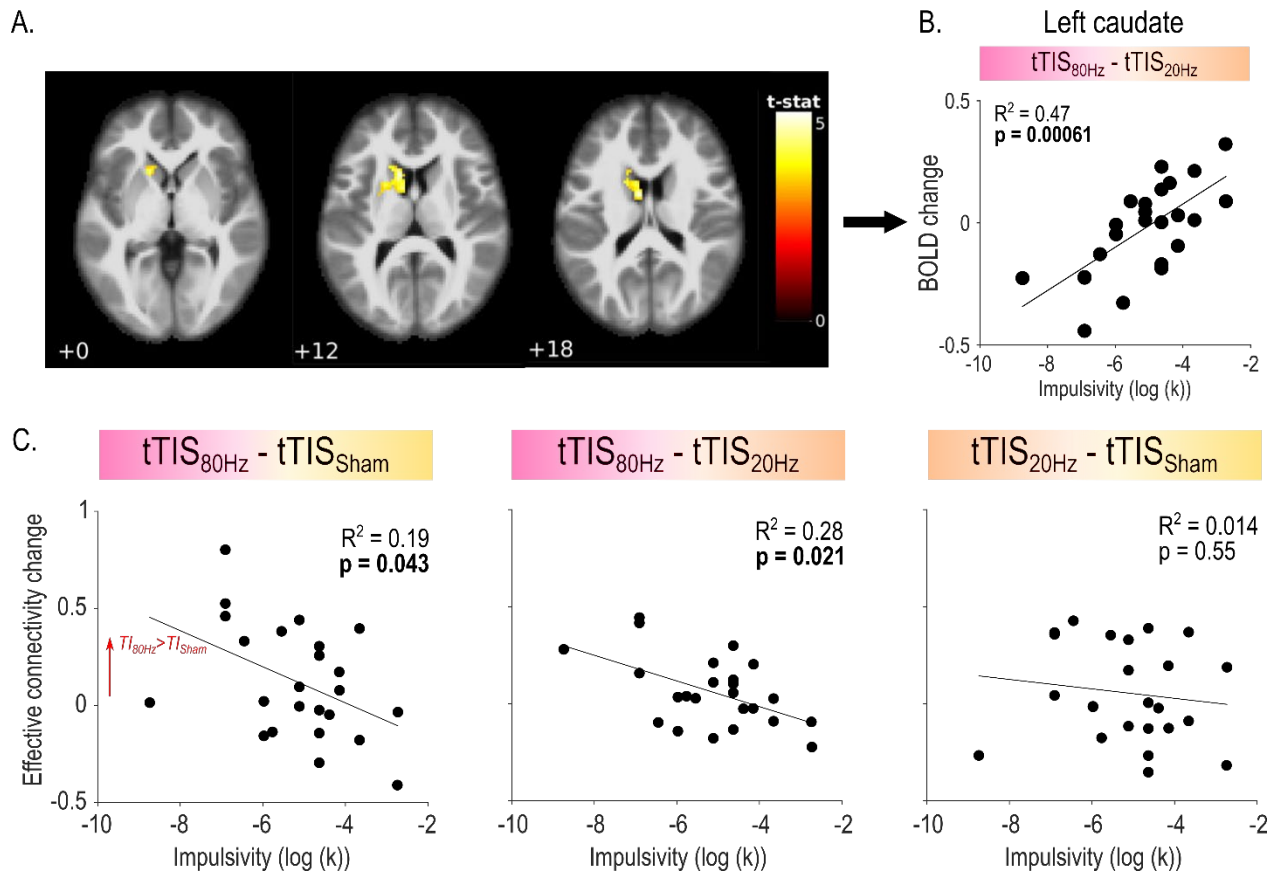

1304  
 1305 **Figure S7. Relationship between impulsivity and the neural effects of  $tTIS_{80Hz}$ .** **A)**  
 1306 **Whole-brain correlation between the neural effects of  $tTIS_{80Hz}$  (with respect to  $tTIS_{20Hz}$ ) and**  
 1307 **impulsivity.** Correlation between  $tTIS$ -related modulation of striatal activity ( $tTIS_{80Hz} - tTIS_{20Hz}$ )  
 1308 during reinforcement motor learning (Reinf<sub>ON</sub>) and individual impulsivity levels. A single significant  
 1309 cluster of correlation was found in left caudate (uncorrected voxel-wise FWE:  $p=0.001$ , and

1310 corrected cluster-based FDR:  $p=0.05$ ). **B) Correlation between left caudate activity and**  
 1311 **impulsivity.** A positive correlation was found showing that participants with higher levels of  
 1312 impulsivity exhibited stronger activation of the left caudate in the  $tTIS_{80Hz}$  (with respect to  $tTIS_{20Hz}$ ).  
 1313 **C) Correlations between impulsivity and  $tTIS$ -related modulation of effective connectivity.**  
 1314 Impulsivity was associated to the neural effects of  $tTIS_{80Hz}$  both when contrasting to  $tTIS_{Sham}$  (left)  
 1315 and  $tTIS_{20Hz}$  (middle), but was not correlated to the effect of  $tTIS_{20Hz}$  (right).

1316

| Cluster-level |           |     |                     | Peak-level |           |      |      |                     | x   | y  | z  | Region                |
|---------------|-----------|-----|---------------------|------------|-----------|------|------|---------------------|-----|----|----|-----------------------|
| pFWE-corr     | qFDR-corr | kE  | P <sub>uncorr</sub> | pFWE-corr  | qFDR-corr | T    | (ZE) | P <sub>uncorr</sub> |     |    |    |                       |
| <0.001        | <0.001    | 254 | <0.001              | 0.707      | 0.524     | 5.29 | 4.20 | <0.001              | -8  | 0  | 18 | Location not in atlas |
|               |           |     |                     | 0.719      | 0.524     | 5.27 | 4.19 | <0.001              | -14 | 16 | 16 | Caudate_L             |
|               |           |     |                     | 0.971      | 0.620     | 4.72 | 3.88 | <0.001              | -16 | 16 | 0  | Location not in atlas |

1317 **Table S4. Significant clusters for the correlation between impulsivity and effects of**  
 1318  **$tTIS_{80Hz}$  on BOLD activity (vs.  $tTIS_{20Hz}$ ).** Related to Figure S7A. One significant cluster  
 1319 encompassing the left caudate nucleus was found. Regions were identified with AAL3<sup>139</sup>.

1320

1321 As a last step, we verified if impulsivity was also predictive of the behavioural effects of  
 1322  $tTIS_{80Hz}$  on reinforcement motor learning. We did not find any significant correlation between  
 1323 impulsivity and the effect of  $tTIS_{80Hz}$  on motor learning ( $tTIS_{80Hz} - tTIS_{Sham}$ :  $R^2=0.098$ ;  $p=0.17$ ;  
 1324  $tTIS_{80Hz} - tTIS_{20Hz}$ :  $R^2=0.11$ ;  $p=0.21$ ). Hence, impulsivity was associated to the neural, but not the  
 1325 behavioural effects of  $tTIS_{80Hz}$ .

1326

1327 Overall, we found that impulsivity was associated to  $tTIS_{80Hz}$ -related BOLD changes  
 1328 specifically in the left caudate and to changes of effective connectivity between the motor striatum  
 1329 and motor cortex during reinforcement motor learning. Hence, a possibility is that the differences  
 1330 in endogenous striatal gamma-related activity that have been associated to impulsive behaviour  
 1331 in animal models<sup>72-74</sup>, influence the neural effects of  $tTIS_{80Hz}$ . If this is the case, impulsivity could  
 1332 constitute a behavioural factor allowing to determine responsiveness to striatal  $tTIS_{80Hz}$ .



1333 Conversely, an interesting avenue for future research could aim at determining whether impulsivity  
1334 can be modulated by striatal  $tTIS_{80Hz}$ .

1335

1336

### 1337 **13. Imaging quality control**

1338

1339 A threshold of 0.5 was chosen to discard subjects showing more than 40% of voxels with  
1340 framewise displacement FD higher than this threshold. In the current study cohort, no subject  
1341 exceeded the limit value, thus the whole dataset could be used. Furthermore, successful cleaning  
1342 of the data was ensured by visual checking the preprocessing results. In particular, good  
1343 registration between anatomical and functional images and normalization to standard space were  
1344 checked. Signal to noise ratio analysis showed significantly higher tSNR values underneath the  
1345 stimulating electrodes ( $F_{(1,1122)}=249.25$ ,  $p<0.001$ ; **Figure S5**). Moreover, an additional analysis  
1346 showed that this effect was not influenced by the  $tTIS_{TYPE}$  ( $Sphere_{LOCATION} \times tTIS_{TYPE}$ :  
1347  $F_{(2,1118)}=0.0169$ ,  $p=0.98$ ). This result suggests that the stimulation did not introduce additional  
1348 noise to the MR images. In summary, all controls confirmed the good quality of the imaging data.

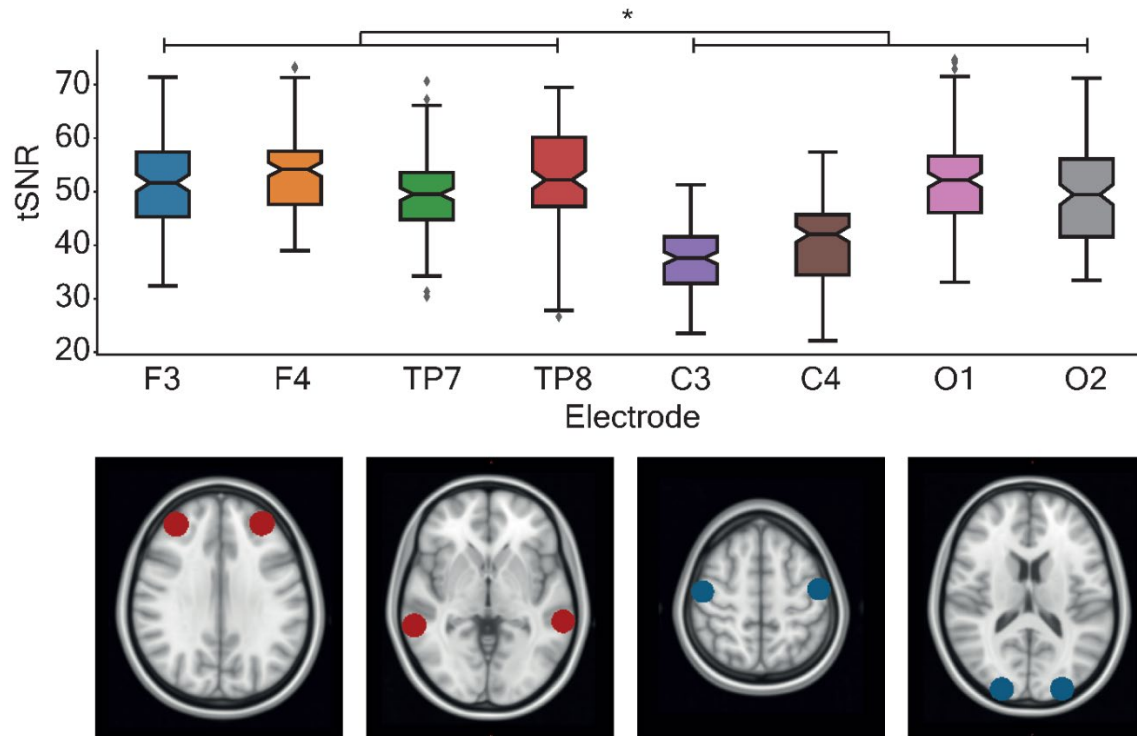

1349  
1350 **Figure S8. Total signal to noise ratio (tSNR).** Total signal to noise ratio investigation. On  
1351 the top panel, the average tSNR is shown within spheres of 10mm radius underneath the 4  
1352 stimulation electrodes (F3, F4, TP7 and TP8) and underneath other 4 locations more distal from  
1353 the electrodes (C3, C4, O1 and O2). A significant higher tSNR was found underneath the  
1354 electrodes with respect to the distal locations ( $F_{(1,1122)}=249.25$ ,  $p<0.001$ ). This indicates that there  
1355 was no reduction of the tSNR due to the presence of electrical current. On the bottom panel, the  
1356 location of the spheres from where the average tSNRs were extracted: F3 and F4 in red in the  
1357 first image from the left, TP7 and TP8 in red on the second image from the left, C3 and C4 in blue  
1358 on the third image from the left, O1 and O2 in blue on the fourth image from the left.

1359 **Acknowledgements**

1360 P.V. was a PhD student supported by the Fund for Research training in Industry and  
1361 Agriculture (FRIA/FNRS; FC29690), and grants by the Platform for Education and Talent  
1362 (Gustave Boël - Sofina Fellowships) and Wallonie-Bruxelles International. J.D. was  
1363 supported by grants from the Belgian FNRS and the Fondation Médicale Reine Elisabeth  
1364 (FMRE). G.D. was supported by the Belgian FNRS. The research was partially funded by  
1365 the Novartis Research Foundation—FreeNovation (Basel, CH) to MJW and EN, the  
1366 Bertarelli Foundation (Catalyst ‘Deep-MCI-T’, Gstaad, CH) to FCH, the SNSF Lead  
1367 Agency (NiBS-iCog 320030L\_197899) to FCH and the Defitech Foundation (Morges, CH)  
1368 to FCH. We acknowledge access to and expertise of the Neuromodulation and the  
1369 Neuroimaging facilities of the Human Neuroscience Platform of the Campus Biotech  
1370 Geneva and of the MRI Platform of the HVS (Sion). We would also like to thank Prof.  
1371 Leonardo Cohen for insightful feedback on a previous version of this manuscript.

1372

1373 **Competing interests**

1374 E.N. is co-founder of TI Solutions AG, a company committed to producing hardware and  
1375 software solutions to support tTIS research.

1376

1377 **Data and code availability statement**

1378 The datasets generated during the current study and the code used to analyse them are  
1379 available from the corresponding author on reasonable request.

1380 **References**

- 1381 1. Neftci, E. O. & Averbeck, B. B. Reinforcement learning in artificial and biological  
1382 systems. *Nat. Mach. Intell.* **1**, 133–143 (2019).
- 1383 2. Schultz, W. Neuronal Reward and Decision Signals: From Theories to Data.  
1384 *Physiol. Rev.* **95**, 853–951 (2015).
- 1385 3. Dhawale, A. K., Smith, M. A. & Ölveczky, B. P. The Role of Variability in Motor  
1386 Learning. *Annu. Rev. Neurosci.* **40**, 479–498 (2017).
- 1387 4. Vassiliadis, P. *et al.* Reward boosts reinforcement-based motor learning. *iScience*  
1388 **24**, 102821 (2021).
- 1389 5. Spampinato, D. & Celnik, P. Multiple Motor Learning Processes in Humans:  
1390 Defining Their Neurophysiological Bases. *Neuroscientist* **27**, 246–267 (2021).
- 1391 6. Huang, V. S., Haith, A., Mazzoni, P. & Krakauer, J. W. Rethinking Motor Learning  
1392 and Savings in Adaptation Paradigms: Model-Free Memory for Successful Actions  
1393 Combines with Internal Models. *Neuron* **70**, 787–801 (2011).
- 1394 7. Galea, J. M., Mallia, E., Rothwell, J. & Diedrichsen, J. The dissociable effects of  
1395 punishment and reward on motor learning. *Nat. Neurosci.* **18**, 597–602 (2015).
- 1396 8. Therrien, A. S., Wolpert, D. M. & Bastian, A. J. Effective Reinforcement learning  
1397 following cerebellar damage requires a balance between exploration and motor  
1398 noise. *Brain* **139**, 101–114 (2016).
- 1399 9. Vassiliadis, P., Derosiere, G. & Duque, J. Beyond Motor Noise : Considering Other  
1400 Causes of Impaired Reinforcement Learning in Cerebellar Patients. *Eneuro* **6**, 1–4  
1401 (2019).

- 1402 10. Widmer, M. *et al.* Reward During Arm Training Improves Impairment and Activity  
1403 After Stroke: A Randomized Controlled Trial. *Neurorehabil. Neural Repair* **0**,  
1404 154596832110628 (2021).
- 1405 11. Bartra, O., McGuire, J. T. & Kable, J. W. The valuation system: A coordinate-  
1406 based meta-analysis of BOLD fMRI experiments examining neural correlates of  
1407 subjective value. *Neuroimage* **76**, 412–427 (2013).
- 1408 12. Hardwick, R. M., Rottschy, C., Miall, R. C. & Eickhoff, S. B. A quantitative meta-  
1409 analysis and review of motor learning in the human brain. *Neuroimage* **67**, 283–  
1410 297 (2013).
- 1411 13. Haber, S. N. Corticostriatal circuitry. *Dialogues Clin. Neurosci.* **18**, 7–21 (2016).
- 1412 14. Balleine, B. W., Delgado, M. R. & Hikosaka, O. The role of the dorsal striatum in  
1413 reward and decision-making. *J. Neurosci.* **27**, 8161–8165 (2007).
- 1414 15. Piray, P., den Ouden, H. E. M., van der Schaaf, M. E., Toni, I. & Cools, R.  
1415 Dopaminergic modulation of the functional ventrodorsal architecture of the human  
1416 striatum. *Cereb. Cortex* **27**, 485–495 (2017).
- 1417 16. Hori, Y. *et al.* Ventral striatum links motivational and motor networks during  
1418 operant-conditioned movement in rats. *Neuroimage* **184**, 943–953 (2019).
- 1419 17. Wachter, T., Lungu, O. V., Liu, T., Willingham, D. T. & Ashe, J. Differential Effect  
1420 of Reward and Punishment on Procedural Learning. *J. Neurosci.* **29**, 436–443  
1421 (2009).
- 1422 18. Widmer, M., Ziegler, N., Held, J., Luft, A. & Lutz, K. Rewarding feedback promotes  
1423 motor skill consolidation via striatal activity. in *Progress in Brain Research* **5**, 303–

- 1424 323 (2016).
- 1425 19. Berke, J. D. Fast oscillations in cortical-striatal networks switch frequency  
1426 following rewarding events and stimulant drugs. *Eur. J. Neurosci.* **30**, 848–859  
1427 (2009).
- 1428 20. van der Meer, M. A. A. *et al.* Integrating early results on ventral striatal gamma  
1429 oscillations in the rat. *Front. Neurosci.* **4**, 1–12 (2010).
- 1430 21. van der Meer, M. A. A. & Redish, A. D. Low and high gamma oscillations in rat  
1431 ventral striatum have distinct relationships to behavior, reward, and spiking activity  
1432 on a learned spatial decision task. *Front. Integr. Neurosci.* **3**, 1–19 (2009).
- 1433 22. Dwiil, L. L., Khokhar, J. Y., Connerney, M. A., Green, A. I. & Doucette, W. T.  
1434 Finding the balance between model complexity and performance: Using ventral  
1435 striatal oscillations to classify feeding behavior in rats. *PLoS Comput. Biol.* **15**, 1–  
1436 19 (2019).
- 1437 23. Matsumoto, J. *et al.* Neuronal responses in the nucleus accumbens shell during  
1438 sexual behavior in male rats. *J. Neurosci.* **32**, 1672–1686 (2012).
- 1439 24. Kalenscher, T., Lansink, C. S., Lankelma, J. V. & Pennartz, C. M. A. Reward-  
1440 associated gamma oscillations in ventral striatum are regionally differentiated and  
1441 modulate local firing activity. *J. Neurophysiol.* **103**, 1658–1672 (2010).
- 1442 25. Cohen, M. X. *et al.* Good vibrations: Cross-frequency coupling in the human  
1443 nucleus accumbens during reward processing. *J. Cogn. Neurosci.* **21**, 875–889  
1444 (2009).
- 1445 26. Sepe-Forrest, L., Carver, F. W., Quentin, R., Holroyd, T. & Nugent, A. C. Basal

- 1446 ganglia activation localized in MEG using a reward task. *Neuroimage: Reports* **1**,  
1447 100034 (2021).
- 1448 27. Herrojo-Ruiz, M. *et al.* Involvement of human internal globus pallidus in the early  
1449 modulation of cortical error-related activity. *Cereb. Cortex* **24**, 1502–1517 (2014).
- 1450 28. Jenkinson, N. & Brown, P. New insights into the relationship between dopamine,  
1451 beta oscillations and motor function. *Trends Neurosci.* **34**, 611–618 (2011).
- 1452 29. Brown, P. Abnormal oscillatory synchronisation in the motor system leads to  
1453 impaired movement. *Curr. Opin. Neurobiol.* **17**, 656–664 (2007).
- 1454 30. McCarthy, M. M. *et al.* Striatal origin of the pathologic beta oscillations in  
1455 Parkinson’s disease. *Proc. Natl. Acad. Sci. U. S. A.* **108**, 11620–11625 (2011).
- 1456 31. Kondabolu, K. *et al.* Striatal cholinergic interneurons generate beta and gamma  
1457 oscillations in the corticostriatal circuit and produce motor deficits. *Proc. Natl.*  
1458 *Acad. Sci. U. S. A.* **113**, 3159–3168 (2016).
- 1459 32. Silberstein, P. *et al.* Cortico-cortical coupling in Parkinson’s disease and its  
1460 modulation by therapy. *Brain* **128**, 1277–1291 (2005).
- 1461 33. Williams, Z. M. & Eskandar, E. N. Selective enhancement of associative learning  
1462 by microstimulation of the anterior caudate. *Nat. Neurosci.* **9**, 562–568 (2006).
- 1463 34. Nakamura, K. & Hikosaka, O. Facilitation of saccadic eye movements by  
1464 postsaccadic electrical stimulation in the primate caudate. *J. Neurosci.* **26**, 12885–  
1465 12895 (2006).
- 1466 35. Deng, Z. De, Lisanby, S. H. & Peterchev, A. V. Electric field depth-focality tradeoff  
1467 in transcranial magnetic stimulation: Simulation comparison of 50 coil designs.

- 1468            *Brain Stimul.* **6**, 1–13 (2013).
- 1469    36.    Wagner, T. *et al.* Transcranial direct current stimulation: A computer-based human  
1470            model study. *Neuroimage* **35**, 1113–1124 (2007).
- 1471    37.    Nickchen, K. *et al.* Reversal learning reveals cognitive deficits and altered  
1472            prediction error encoding in the ventral striatum in Huntington’s disease. *Brain*  
1473            *Imaging Behav.* **11**, 1862–1872 (2017).
- 1474    38.    Schmidt, L. *et al.* Disconnecting force from money: Effects of basal ganglia  
1475            damage on incentive motivation. *Brain* **131**, 1303–1310 (2008).
- 1476    39.    Seymour, B. *et al.* Deep brain stimulation of the subthalamic nucleus modulates  
1477            sensitivity to decision outcome value in Parkinson’s disease. *Sci. Rep.* **6**, 1–12  
1478            (2016).
- 1479    40.    Atkinson-Clement, C. *et al.* Effects of subthalamic nucleus stimulation and  
1480            levodopa on decision-making in Parkinson’s disease. *Mov. Disord.* **34**, 377–385  
1481            (2019).
- 1482    41.    Grossman, N. *et al.* Noninvasive Deep Brain Stimulation via Temporally Interfering  
1483            Electric Fields. *Cell* **169**, 1029-1041.e16 (2017).
- 1484    42.    Song, S., Zhang, J., Tian, Y., Wang, L. & Wei, P. Temporal Interference  
1485            Stimulation Regulates Eye Movements and Neural Activity in the Mice Superior  
1486            Colliculus. *Proc. Annu. Int. Conf. IEEE Eng. Med. Biol. Soc. EMBS* 6231–6234  
1487            (2021). doi:10.1109/EMBC46164.2021.9629968
- 1488    43.    Esmailpour, Z., Kronberg, G., Reato, D., Parra, L. C. & Bikson, M. Temporal  
1489            interference stimulation targets deep brain regions by modulating neural



- 1490 oscillations. *Brain Stimul.* **14**, 55–65 (2021).
- 1491 44. Rampersad, S. *et al.* Prospects for transcranial temporal interference stimulation  
1492 in humans: A computational study. *Neuroimage* **202**, 116124 (2019).
- 1493 45. von Conta, J. *et al.* Interindividual variability of electric fields during transcranial  
1494 temporal interference stimulation (tTIS). *Sci. Rep.* **11**, 1–12 (2021).
- 1495 46. Cao, J., Doiron, B., Goswami, C. & Grover, P. The mechanics of temporal  
1496 interference stimulation. *bioRxiv* 1–6 (2020). doi:10.1101/2020.04.23.051870
- 1497 47. Mirzakhaili, E., Barra, B., Capogrosso, M. & Lempka, S. F. Biophysics of  
1498 Temporal Interference Stimulation. *Cell Syst.* **11**, 557-572.e5 (2020).
- 1499 48. von Conta, J. *et al.* Benchmarking the effects of transcranial temporal interference  
1500 stimulation (tTIS) in humans. *Cortex* **154**, 299–310 (2022).
- 1501 49. Ma, R. *et al.* High Gamma and Beta Temporal Interference Stimulation in the  
1502 Human Motor Cortex Improves Motor Functions. *Front. Neurosci.* **15**, 1–11 (2022).
- 1503 50. Hutcheon, B. & Yarom, Y. Resonance, oscillation and the intrinsic frequency  
1504 preferences of neurons. *Trends Neurosci.* **23**, 216–222 (2000).
- 1505 51. Acerbo, E. *et al.* Focal non-invasive deep-brain stimulation with temporal  
1506 interference for the suppression of epileptic biomarkers. *Front. Neurosci.* **16**, 1–12  
1507 (2022).
- 1508 52. Wessel, M. J. *et al.* LTP-like noninvasive striatal brain stimulation enhances  
1509 striatal activity and motor skill learning in humans. *bioRxiv* 1–30 (2022).  
1510 doi:10.1101/2022.10.28.514204
- 1511 53. Violante, I. R. *et al.* Non-invasive temporal interference electrical stimulation of the

- 1512 human hippocampus. *bioRxiv* (2022). doi:10.1101/2022.09.14.507625
- 1513 54. Abe, M. *et al.* Reward improves long-term retention of a motor memory through  
1514 induction of offline memory gains. *Curr. Biol.* **21**, 557–562 (2011).
- 1515 55. Steel, A., Silson, E. H., Stagg, C. J. & Baker, C. I. The impact of reward and  
1516 punishment on skill learning depends on task demands. *Sci. Rep.* **6**, 1–9 (2016).
- 1517 56. Vassiliadis, P., Lete, A., Duque, J. & Derosiere, G. Reward timing matters in motor  
1518 learning. *iScience* **25**, 104290 (2022).
- 1519 57. Izawa, J. & Shadmehr, R. Learning from sensory and reward prediction errors  
1520 during motor adaptation. *PLoS Comput. Biol.* **7**, 1–12 (2011).
- 1521 58. Mawase, F., Uehara, S., Bastian, A. J. & Celnik, P. Motor Learning Enhances  
1522 Use-Dependent Plasticity. *J. Neurosci.* **37**, 2673–2685 (2017).
- 1523 59. Iacono, M. I. *et al.* MIDA: A multimodal imaging-based detailed anatomical model  
1524 of the human head and neck. *PLoS One* **10**, (2015).
- 1525 60. Jiang, T. Brainnetome: A new -ome to understand the brain and its disorders.  
1526 *Neuroimage* **80**, 263–272 (2013).
- 1527 61. Areshenkoff, C. N., de Brouwer, A. J., Gale, D. J., Nashed, J. Y. & Gallivan, J. P.  
1528 Separate and shared low-dimensional neural architectures for error-based and  
1529 reinforcement motor learning. *bioRxiv* (2022). doi:10.1101/2022.08.16.504134
- 1530 62. Cashaback, J. G. A., McGregor, H. R., Mohatarem, A. & Gribble, P. L.  
1531 Dissociating error-based and reinforcement-based loss functions during  
1532 sensorimotor learning. *PLoS Comput. Biol.* **13**, 1–28 (2017).
- 1533 63. Floyer-Lea, A. & Matthews, P. M. Changing brain networks for visuomotor control

- 1534 with increased movement automaticity. *J. Neurophysiol.* **92**, 2405–2412 (2004).
- 1535 64. Floyer-Lea, A. & Matthews, P. M. Distinguishable brain activation networks for  
1536 short- and long-term motor skill learning. *J. Neurophysiol.* **94**, 512–518 (2005).
- 1537 65. Graybiel, A. M. & Grafton, S. T. The striatum: Where skills and habits meet. *Cold*  
1538 *Spring Harb. Perspect. Biol.* **7**, 1–14 (2015).
- 1539 66. McLaren, D. G., Ries, M. L., Xu, G. & Johnson, S. C. A generalized form of  
1540 context-dependent psychophysiological interactions (gPPI): A comparison to  
1541 standard approaches. *Neuroimage* **61**, 1277–1286 (2012).
- 1542 67. Codol, O., Holland, P. J., Manohar, S. G. & Galea, J. M. Reward-Based  
1543 Improvements in Motor Control Are Driven by Multiple Error-Reducing  
1544 Mechanisms. *J. Neurosci.* **40**, 3604–3620 (2020).
- 1545 68. Sidarta, A., Vahdat, S., Bernardi, N. F. & Ostry, D. J. Somatic and reinforcement-  
1546 based plasticity in the initial stages of human motor learning. *J. Neurosci.* **36**,  
1547 11682–11692 (2016).
- 1548 69. Krause, M. R., Vieira, P. G., Csorba, B. A., Pilly, P. K. & Pack, C. C. Transcranial  
1549 alternating current stimulation entrains single-neuron activity in the primate brain.  
1550 *Proc. Natl. Acad. Sci. U. S. A.* **116**, 5747–5755 (2019).
- 1551 70. Shirer, W. R., Ryali, S., Rykhlevskaia, E., Menon, V. & Greicius, M. D. Decoding  
1552 subject-driven cognitive states with whole-brain connectivity patterns. *Cereb.*  
1553 *Cortex* **22**, 158–165 (2012).
- 1554 71. Morishita, T. & Hummel, F. C. Non-invasive Brain Stimulation (NIBS) in Motor  
1555 Recovery After Stroke: Concepts to Increase Efficacy. *Curr. Behav. Neurosci.*

- 1556        *Reports* **4**, 280–289 (2017).
- 1557    72.    Donnelly, N. A. *et al.* Oscillatory activity in the medial prefrontal cortex and nucleus  
1558        accumbens correlates with impulsivity and reward outcome. *PLoS One* **9**, 14–17  
1559        (2014).
- 1560    73.    Schall, T. A., Wright, W. J. & Dong, Y. Nucleus accumbens fast-spiking  
1561        interneurons in motivational and addictive behaviors. *Mol. Psychiatry* **26**, 234–246  
1562        (2021).
- 1563    74.    Pisansky, M. T. *et al.* Nucleus Accumbens Fast-Spiking Interneurons Constrain  
1564        Impulsive Action. *Biol. Psychiatry* **86**, 836–847 (2019).
- 1565    75.    Kirby, K. N., Petry, N. M. & Bickel, W. K. Heroin addicts have higher discount rates  
1566        for delayed rewards than non-drug-using controls. *J. Exp. Psychol. Gen.* **128**, 78–  
1567        87 (1999).
- 1568    76.    Mitchell, J. M., Fields, H. L., D’Esposito, M. & Boettiger, C. A. Impulsive  
1569        responding in alcoholics. *Alcohol. Clin. Exp. Res.* **29**, 2158–2169 (2005).
- 1570    77.    Catanese, J., Carmichael, J. E. & van der Meer, M. A. A. Low- and high-gamma  
1571        oscillations deviate in opposite directions from zero-phase synchrony in the limbic  
1572        corticostriatal loop. *J. Neurophysiol.* **116**, 5–17 (2016).
- 1573    78.    Rothé, M., Quilodran, R., Sallet, J. & Procyk, E. Coordination of high gamma  
1574        activity in anterior cingulate and lateral prefrontal cortical areas during adaptation.  
1575        *J. Neurosci.* **31**, 11110–11117 (2011).
- 1576    79.    Del Arco, A., Park, J., Wood, J., Kim, Y. & Moghaddam, B. Adaptive encoding of  
1577        outcome prediction by prefrontal cortex ensembles supports behavioral flexibility.

- 1578 *J. Neurosci.* **37**, 8363–8373 (2017).
- 1579 80. Yoshimoto, A., Shibata, Y., Kudara, M., Ikegaya, Y. & Matsumoto, N.  
1580 Enhancement of Motor Cortical Gamma Oscillations and Sniffing Activity by  
1581 Medial Forebrain Bundle Stimulation Precedes Locomotion. *eNeuro* **9**, 1–14  
1582 (2022).
- 1583 81. Grover, S., Nguyen, J. A., Viswanathan, V. & Reinhart, R. M. G. High-frequency  
1584 neuromodulation improves obsessive–compulsive behavior. *Nat. Med.* **27**, 232–  
1585 238 (2021).
- 1586 82. Krause, M. R., Vieira, P. G., Thivierge, J. P. & Pack, C. C. Brain stimulation  
1587 competes with ongoing oscillations for control of spike timing in the primate brain.  
1588 *PLoS Biol.* **20**, 1–27 (2022).
- 1589 83. Courtemanche, R., Fujii, N. & Graybiel, A. M. Synchronous, Focally Modulated  $\beta$ -  
1590 Band Oscillations Characterize Local Field Potential Activity in the Striatum of  
1591 Awake Behaving Monkeys. *J. Neurosci.* **23**, 11741–11752 (2003).
- 1592 84. Costa, R. M. *et al.* Rapid Alterations in Corticostriatal Ensemble Coordination  
1593 during Acute Dopamine-Dependent Motor Dysfunction. *Neuron* **52**, 359–369  
1594 (2006).
- 1595 85. Engel, A. K. & Fries, P. Beta-band oscillations-signalling the status quo? *Curr.*  
1596 *Opin. Neurobiol.* **20**, 156–165 (2010).
- 1597 86. Uehara, S., Mawase, F. & Celnik, P. Learning similar actions by reinforcement or  
1598 sensory-prediction errors rely on distinct physiological mechanisms. *Cereb. Cortex*  
1599 **28**, 3478–3490 (2018).

- 1600 87. Mathis, M. W., Mathis, A. & Uchida, N. Somatosensory Cortex Plays an Essential  
1601 Role in Forelimb Motor Adaptation in Mice. *Neuron* **93**, 1493-1503.e6 (2017).
- 1602 88. Brücke, C. *et al.* Scaling of movement is related to pallidal  $\gamma$  oscillations in patients  
1603 with dystonia. *J. Neurosci.* **32**, 1008–1019 (2012).
- 1604 89. Soderstrom, N. C. & Bjork, R. A. Learning Versus Performance: An Integrative  
1605 Review. *Perspect. Psychol. Sci.* **10**, 176–199 (2015).
- 1606 90. Spampinato, D. A., Satar, Z. & Rothwell, J. C. Combining reward and M1  
1607 transcranial direct current stimulation enhances the retention of newly learnt  
1608 sensorimotor mappings. *Brain Stimul.* 1–8 (2019). doi:10.1016/j.brs.2019.05.015
- 1609 91. Shmuelof, L. *et al.* Overcoming Motor ‘Forgetting’ Through Reinforcement Of  
1610 Learned Actions. *J. Neurosci.* **32**, 14617-14621a (2012).
- 1611 92. Dhawale, A. K., Miyamoto, Y. R., Smith, M. A. & Ölveczky, B. P. Adaptive  
1612 Regulation of Motor Variability. *Curr. Biol.* **29**, 3551-3562.e7 (2019).
- 1613 93. Carroll, T. J., McNamee, D., Ingram, J. N. & Wolpert, D. M. Rapid visuomotor  
1614 responses reflect value-based decisions. *J. Neurosci.* **39**, 3906–3920 (2019).
- 1615 94. De Comite, A., Crevecoeur, F. & Lefèvre, P. Reward-Dependent Selection of  
1616 Feedback Gains Impacts Rapid Motor Decisions. *Eneuro* **9**, ENEURO.0439-  
1617 21.2022 (2022).
- 1618 95. Codol, O. *et al.* Sensorimotor feedback loops are selectively sensitive to reward.  
1619 *Elife* **12**, 1–25 (2023).
- 1620 96. Krakauer, J. W., Hadjiosif, A. M., Xu, J., Wong, A. L. & Haith, A. M. Motor  
1621 Learning. *Compr. Physiol.* **9**, 613–663 (2019).

- 1622 97. Quattrocchi, G. *et al.* Pharmacological Dopamine Manipulation Does Not Alter  
1623 Reward-Based Improvements in Memory Retention during a Visuomotor  
1624 Adaptation Task. *Eneuro* **5**, ENEURO.0453-17.2018 (2018).
- 1625 98. Johnson, L. *et al.* Dose-dependent effects of transcranial alternating current  
1626 stimulation on spike timing in awake nonhuman primates. *Sci. Adv.* **6**, 1–9 (2020).
- 1627 99. Beliaeva, V., Savvateev, I., Zerbi, V. & Polania, R. Toward integrative approaches  
1628 to study the causal role of neural oscillations via transcranial electrical stimulation.  
1629 *Nat. Commun.* **12**, 1–12 (2021).
- 1630 100. Averbeck, B. & O’Doherty, J. P. Reinforcement-learning in fronto-striatal circuits.  
1631 *Neuropsychopharmacology* **47**, 147–162 (2022).
- 1632 101. Ma, I. *et al.* Ventral striatal hyperconnectivity during rewarded interference control  
1633 in adolescents with ADHD. *Cortex* **82**, 225–236 (2016).
- 1634 102. Wang, Q. *et al.* Dissociated neural substrates underlying impulsive choice and  
1635 impulsive action. *Neuroimage* **134**, 540–549 (2016).
- 1636 103. Mosley, P. E. *et al.* The structural connectivity of discrete networks underlies  
1637 impulsivity and gambling in Parkinson’s disease. *Brain* **142**, 3917–3935 (2019).
- 1638 104. Hampton, W. H., Alm, K. H., Venkatraman, V., Nugiel, T. & Olson, I. R.  
1639 Dissociable frontostriatal white matter connectivity underlies reward and motor  
1640 impulsivity. *Neuroimage* **150**, 336–343 (2017).
- 1641 105. Negahbani, E., Kasten, F. H., Herrmann, C. S. & Fröhlich, F. Targeting alpha-band  
1642 oscillations in a cortical model with amplitude-modulated high-frequency  
1643 transcranial electric stimulation. *Neuroimage* **173**, 3–12 (2018).

- 1644 106. Cohen, J. *Statistical power analysis for the behavioral sciences*. L. Erlbaum  
1645 *Associates* **13**, (1988).
- 1646 107. Hashemirad, F., Zoghi, M., Fitzgerald, P. B. & Jaberzadeh, S. The effect of anodal  
1647 transcranial direct current stimulation on motor sequence learning in healthy  
1648 individuals: A systematic review and meta-analysis. *Brain Cogn.* **102**, 1–12 (2016).
- 1649 108. Soutschek, A., Kang, P., Ruff, C. C., Hare, T. A. & Tobler, P. N. Brain Stimulation  
1650 Over the Frontopolar Cortex Enhances Motivation to Exert Effort for Reward. *Biol.*  
1651 *Psychiatry* **84**, 38–45 (2018).
- 1652 109. Wischnewski, M., Zerr, P. & Schutter, D. J. L. G. Effects of Theta Transcranial  
1653 Alternating Current Stimulation Over the Frontal Cortex on Reversal Learning.  
1654 *Brain Stimul.* **9**, 705–711 (2016).
- 1655 110. Guerra, A., López-Alonso, V., Cheeran, B. & Suppa, A. Variability in non-invasive  
1656 brain stimulation studies: Reasons and results. *Neurosci. Lett.* **719**, 133330  
1657 (2020).
- 1658 111. Cassarà, A. M. *et al.* Safety Recommendations for Temporal Interference  
1659 Stimulation in the Brain. *bioRxiv* 1–69 (2022). doi:10.1101/2022.12.15.520077
- 1660 112. Oldfield, R. C. The assessment and analysis of handedness: The Edinburgh  
1661 inventory. *Neuropsychologia* **9**, 97–113 (1971).
- 1662 113. Kaplan, B. A. *et al.* Automating Scoring of Delay Discounting for the 21- and 27-  
1663 Item Monetary Choice Questionnaires. *Behav. Anal.* **39**, 293–304 (2016).
- 1664 114. Mitchell, M. R. & Potenza, M. N. Recent Insights into the Neurobiology of  
1665 Impulsivity. *Curr. Addict. Reports* **1**, 309–319 (2014).



- 1666 115. Brainard, D. H. The Psychophysics Toolbox. *Spat. Vis.* **10**, 433–436 (1997).
- 1667 116. Pelli, D. G. The VideoToolbox software for visual psychophysics: transforming  
1668 numbers into movies. *Spat. Vis.* **10**, 437–442 (1997).
- 1669 117. Dayan, E., Averbeck, B. B., Richmond, B. J. & Cohen, L. G. Stochastic  
1670 reinforcement benefits skill acquisition. *Learn. Mem.* **21**, 140–142 (2014).
- 1671 118. Grossman, N. Modulation without surgical intervention. *Science (80-. )*. **361**, 461–  
1672 462 (2018).
- 1673 119. Antal, A. *et al.* Low intensity transcranial electric stimulation: Safety, ethical, legal  
1674 regulatory and application guidelines. *Clin. Neurophysiol.* **128**, 1774–1809 (2017).
- 1675 120. Ekhtiari, H. *et al.* A checklist for assessing the methodological quality of concurrent  
1676 tES-fMRI studies (ContES checklist): a consensus study and statement. *Nat.*  
1677 *Protoc.* **17**, 596–617 (2022).
- 1678 121. Bossetti, C. A., Birdno, M. J. & Grill, W. M. Analysis of the quasi-static  
1679 approximation for calculating potentials generated by neural stimulation. *J. Neural*  
1680 *Eng.* **5**, 44–53 (2008).
- 1681 122. Hasgall, P. *et al.* “IT’IS Database for thermal and electromagnetic parameters of  
1682 biological tissues,” Version 4.1. (2022). doi:10.13099/VIP21000-04-1
- 1683 123. Seeck, M. *et al.* The standardized EEG electrode array of the IFCN. *Clin.*  
1684 *Neurophysiol.* **128**, 2070–2077 (2017).
- 1685 124. Bates, D., Mächler, M., Bolker, B. M. & Walker, S. C. Fitting linear mixed-effects  
1686 models using lme4. *J. Stat. Softw.* **67**, (2015).
- 1687 125. Ryu, E. Effects of skewness and kurtosis on normal-theory based maximum

- 1688 likelihood test statistic in multilevel structural equation modeling. *Behav. Res.*  
1689 *Methods* **43**, 1066–1074 (2011).
- 1690 126. Nieuwenhuis, R., te Grotenhuis, M. & Pelzer, B. Influence.ME: Tools for detecting  
1691 influential data in mixed effects models. *R J.* **4**, 38–47 (2012).
- 1692 127. Luke, S. G. Evaluating significance in linear mixed-effects models in R. *Behav.*  
1693 *Res. Methods* **49**, 1494–1502 (2017).
- 1694 128. Searle, S. R., Speed, F. M. & Milliken, G. A. Population marginal means in the  
1695 linear model: An alternative to least squares means. *Am. Stat.* **34**, 216–221  
1696 (1980).
- 1697 129. Ben-Shachar, M., Lüdtke, D. & Makowski, D. effectsize: Estimation of Effect Size  
1698 Indices and Standardized Parameters. *J. Open Source Softw.* **5**, 2815 (2020).
- 1699 130. Derosière, G., Billot, M., Ward, E. T. & Perrey, S. Adaptations of motor neural  
1700 structures' activity to lapses in attention. *Cereb. Cortex* **25**, 66–74 (2015).
- 1701 131. Okamoto, M. *et al.* Three-dimensional probabilistic anatomical cranio-cerebral  
1702 correlation via the international 10-20 system oriented for transcranial functional  
1703 brain mapping. *Neuroimage* **21**, 99–111 (2004).
- 1704 132. Di, X., Zhang, Z. & Biswal, B. B. Understanding psychophysiological interaction  
1705 and its relations to beta series correlation. *Brain Imaging Behav.* **15**, 958–973  
1706 (2021).
- 1707 133. Bowles, S. *et al.* Vagus nerve stimulation drives selective circuit modulation  
1708 through cholinergic reinforcement. *Neuron* **110**, 2867-2885.e7 (2022).
- 1709 134. Codol, O., Galea, J. M., Jalali, R. & Holland, P. J. Reward-driven enhancements in

- 1710 motor control are robust to TMS manipulation. *bioRxiv* 2020.01.12.903419 (2020).  
1711 doi:10.1101/2020.01.12.903419
- 1712 135. Draganski, B. *et al.* Evidence for segregated and integrative connectivity patterns  
1713 in the human basal ganglia. *J. Neurosci.* **28**, 7143–7152 (2008).
- 1714 136. Morris, L. S. *et al.* Fronto-striatal organization: Defining functional and  
1715 microstructural substrates of behavioural flexibility. *Cortex* **74**, 118–133 (2016).
- 1716 137. Lam, S. Y. & Zénon, A. Information rate in humans during visuomotor tracking.  
1717 *Entropy* **23**, 1–13 (2021).
- 1718 138. Uehara, S., Mawase, F., Therrien, A. S., Cherry-Allen, K. M. & Celnik, P.  
1719 Interactions between motor exploration and reinforcement learning. *J.*  
1720 *Neurophysiol.* **122**, 797–808 (2019).
- 1721 139. Rolls, E. T., Huang, C. C., Lin, C. P., Feng, J. & Joliot, M. Automated anatomical  
1722 labelling atlas 3. *Neuroimage* **206**, 116189 (2020).
- 1723
